# Supplementary material for: Synthesis of Novel Crown Ether-Squaramides and Their Application as Phase-Transfer Catalysts
Source: MDPI journal article supplement (doi:10.3390/molecules26216542), 2021-10-29
Supplement: s1 [file s1]

# Synthesis of Novel Crown Ether-Squaramides and Their Application as Phase-Transfer Catalysts

Zsuzsanna Fehér <sup>1</sup>, Dóra Richter <sup>1</sup>, Sándor Nagy <sup>1</sup>, Péter Bagi <sup>1</sup>, Zsolt Rapi <sup>1</sup>, András Simon <sup>2</sup>, László Drahos <sup>3</sup>, Péter Huszthy <sup>1</sup>, Péter Bakó <sup>1</sup> and József Kupai <sup>1,\*</sup>

**Citation:** Fehér, Z.; Richter, D.; Nagy, S.; Bagi, P.; Rapi, Z.; Simon, A.; Drahos, L.; Huszthy, P.; Bakó, P.; Kupai, J. Synthesis of Novel Crown Ether-Squaramides and Their Application as Phase-Transfer Catalysts. *Molecules* **2021**, *26*, 6542. <https://doi.org/10.3390/molecules26216542>

Academic Editors: Dimitrios Bikiaris and Maurizio Benaglia

Received: 15 September 2021  
Accepted: 27 October 2021  
Published: 29 October 2021

**Publisher's Note:** MDPI stays neutral with regard to jurisdictional claims in published maps and institutional affiliations.

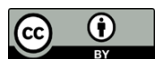

**Copyright:** © 2021 by the authors. Licensee MDPI, Basel, Switzerland. This article is an open access article distributed under the terms and conditions of the Creative Commons Attribution (CC BY) license (<http://creativecommons.org/licenses/by/4.0/>).

- <sup>1</sup> Department of Organic Chemistry and Technology, Budapest University of Technology and Economics, Szent Gellért tér 4, H-1111 Budapest, Hungary; zsuzsanna.fehér@edu.bme.hu (Z.F.); richterdora98@gmail.com (D.R.); nagy.sandor@mail.bme.hu (S.N.); bagi.peter@vbk.bme.hu (P.B.); rapi.zsolt@vbk.bme.hu (Z.R.); huszthy.peter@vbk.bme.hu (P.H.); bako.peter@vbk.bme.hu (P.B.)
- <sup>2</sup> Department of Inorganic and Analytical Chemistry, Budapest University of Technology and Economics, Szent Gellért tér 4, H-1111 Budapest, Hungary; simon.andras@vbk.bme.hu
- <sup>3</sup> MS Proteomics Research Group, Research Centre for Natural Sciences, Hungarian Academy of Sciences, Magyar Tudósok körútja 2, H-1117 Budapest, Hungary; drahos.laszlo@ttk.hu
- \* Correspondence: kupai.jozsef@vbk.bme.hu; Tel.: +36-14-632-369  
<https://www.kupaigroup.com/>

## Supporting Information

|                                                           |                    |    |
|-----------------------------------------------------------|--------------------|----|
| 1.....                                                    | NMR spectra        | 2  |
| NMR spectra of intermediate <b>C-HSQ</b> .....            |                    | 2  |
| NMR spectra of catalyst <b>C5</b> .....                   |                    | 8  |
| NMR spectra of catalyst <b>C6</b> .....                   |                    | 14 |
| NMR spectra of catalyst <b>Q5</b> .....                   |                    | 19 |
| NMR spectra of catalyst <b>Q6</b> .....                   |                    | 25 |
| NMR spectra of catalyst <b>HQ5</b> .....                  |                    | 30 |
| NMR spectra of catalyst <b>G5</b> .....                   |                    | 35 |
| 2.....                                                    | HPLC chromatograms | 41 |
| Product <b>3</b> of $\alpha$ -alkylation reaction.....    |                    | 41 |
| Product <b>5</b> of <i>Michael</i> addition reaction..... |                    | 43 |

# 1. NMR spectra

NMR spectra of intermediate **C-HSQ**

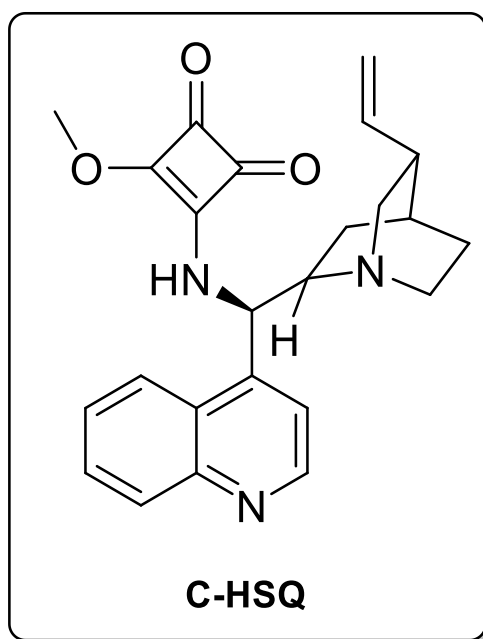

Figure S1. Molecule structure of intermediate **C-HSQ**

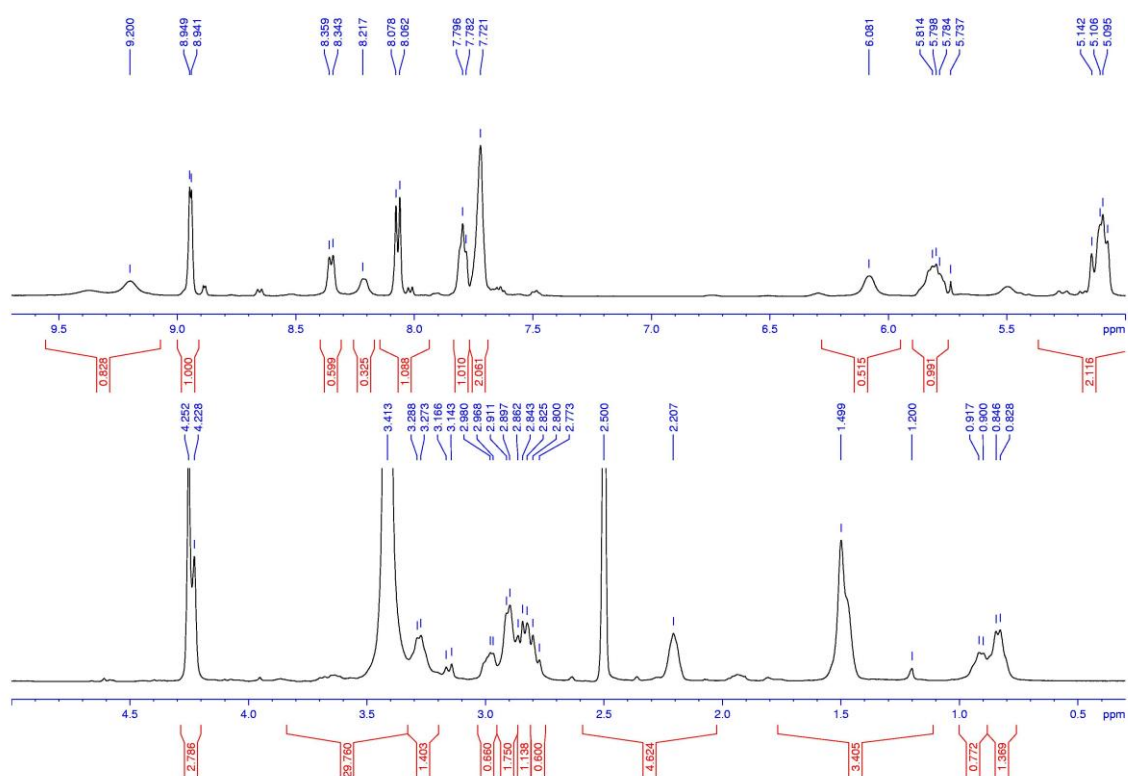

Figure S2. <sup>1</sup>H NMR spectrum of intermediate **C-HSQ** (500.13 MHz, DMSO-d<sub>6</sub>)

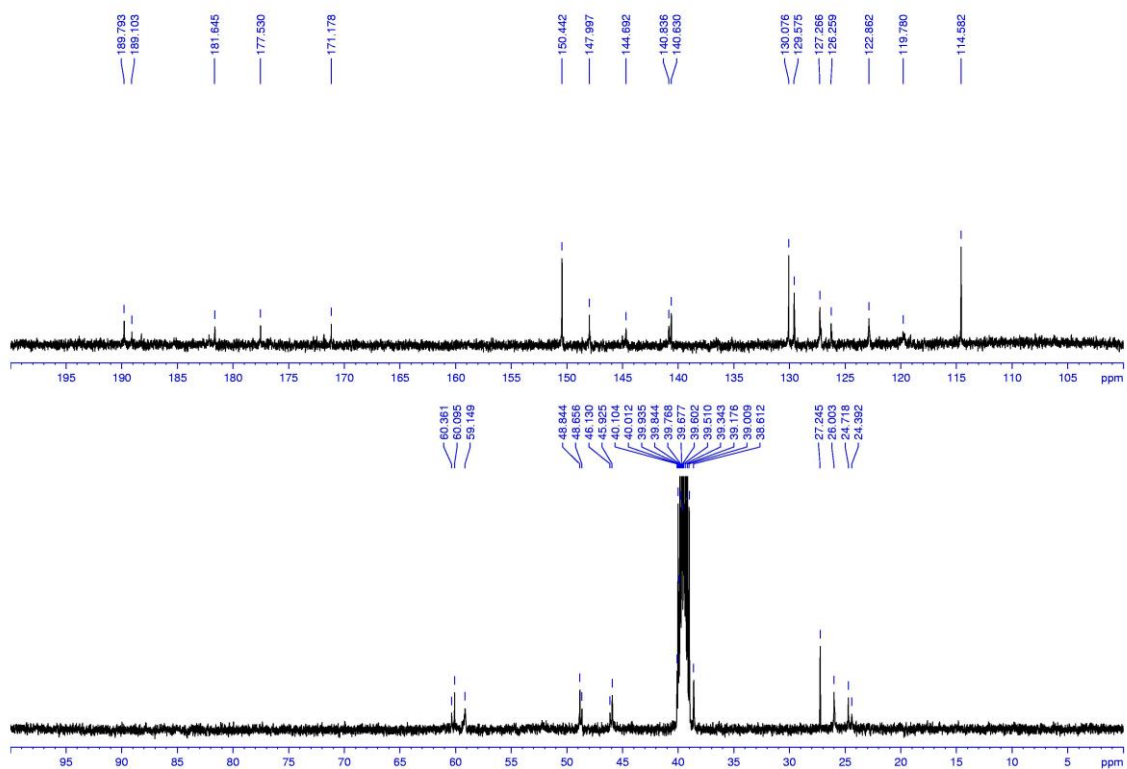

**Figure S3.**  $^{13}\text{C}$  NMR spectrum of intermediate C-HSQ (125.76 MHz, DMSO- $\text{d}_6$ )

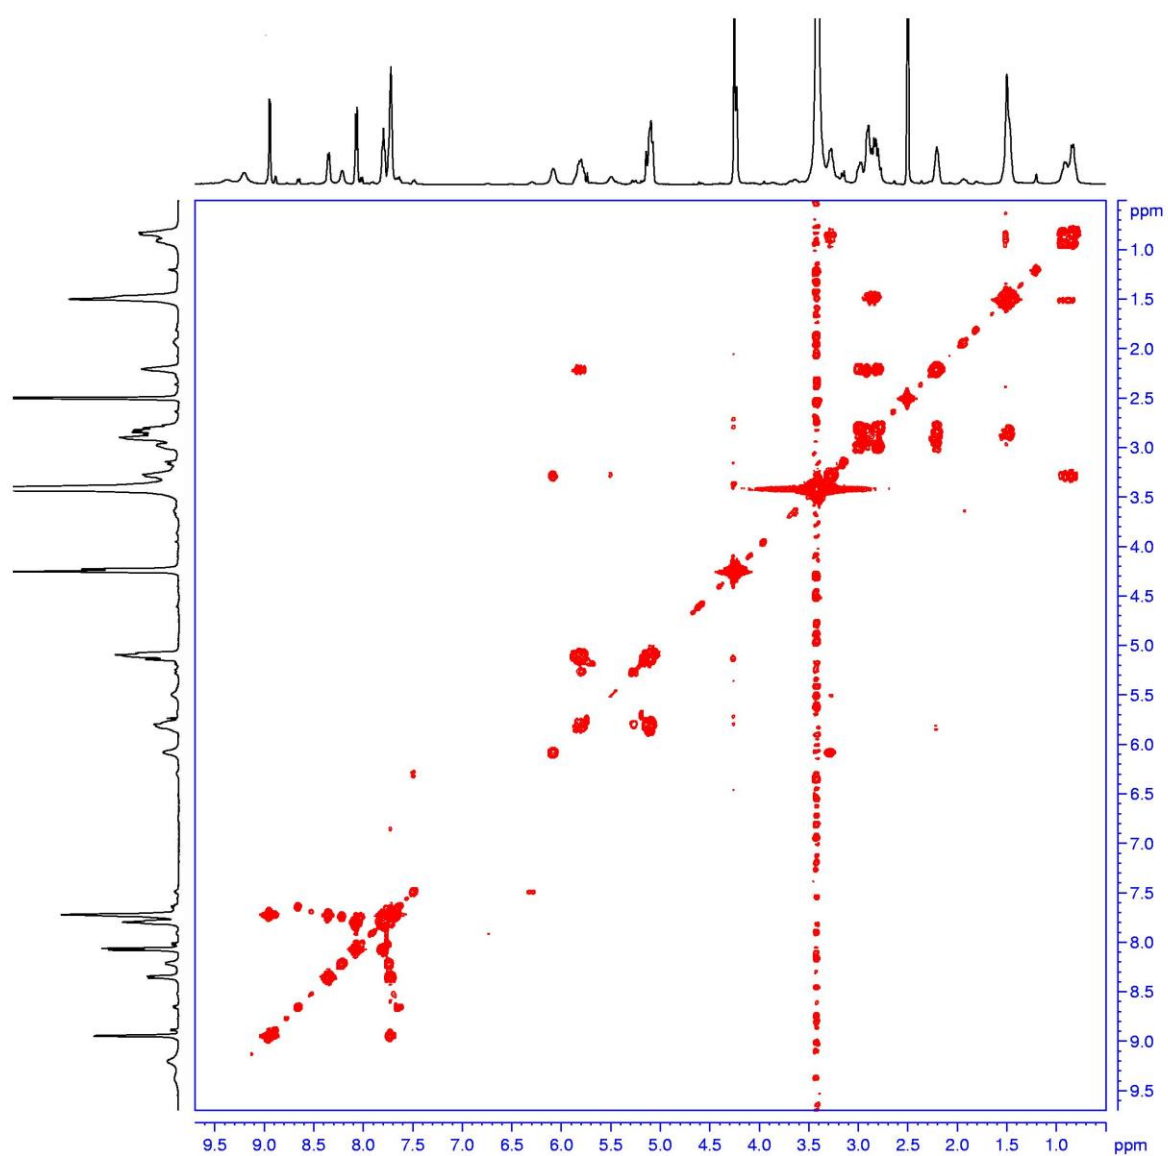

**Figure S4.**  $^1\text{H}$ -gs-COSY NMR spectrum of intermediate **C-HSQ** ( $\text{DMSO-d}_6$ )

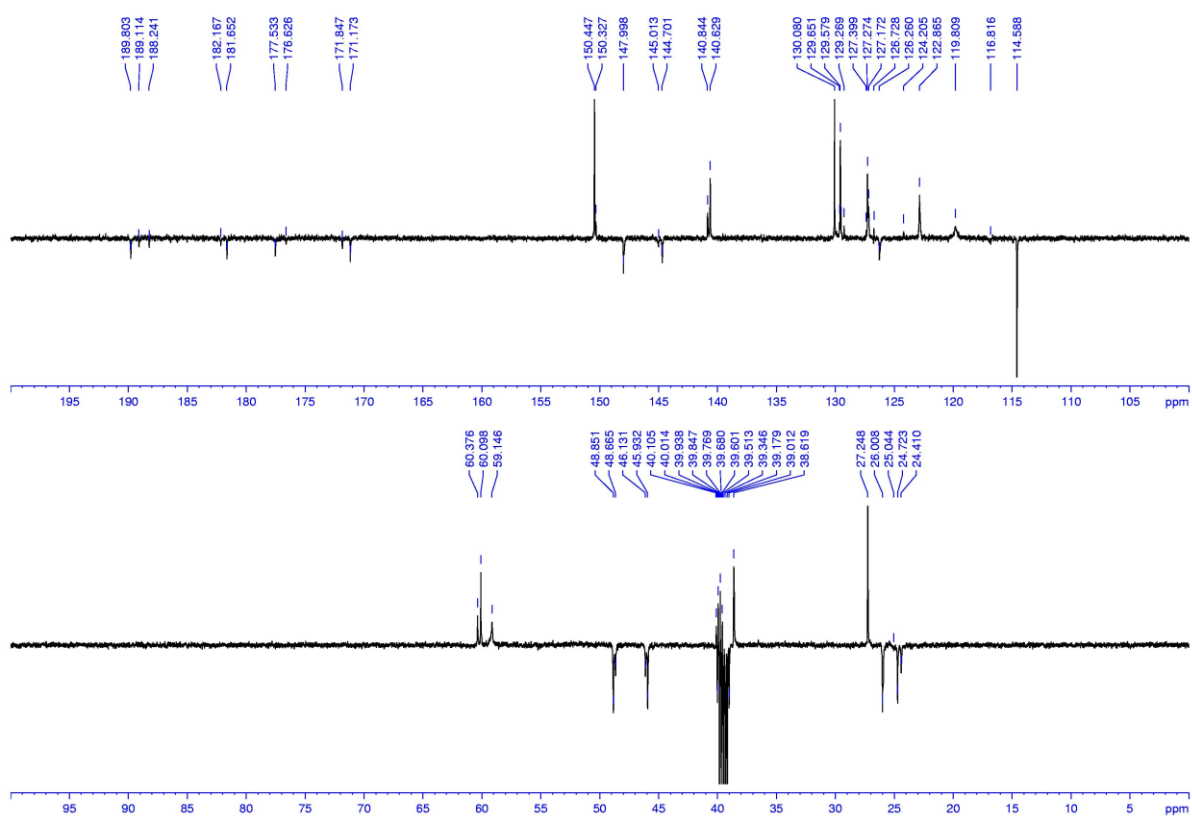

**Figure S5.**  $^{13}\text{C}$  DEPTQ NMR spectrum of intermediate **C-HSQ** ( $\text{DMSO-d}_6$ )

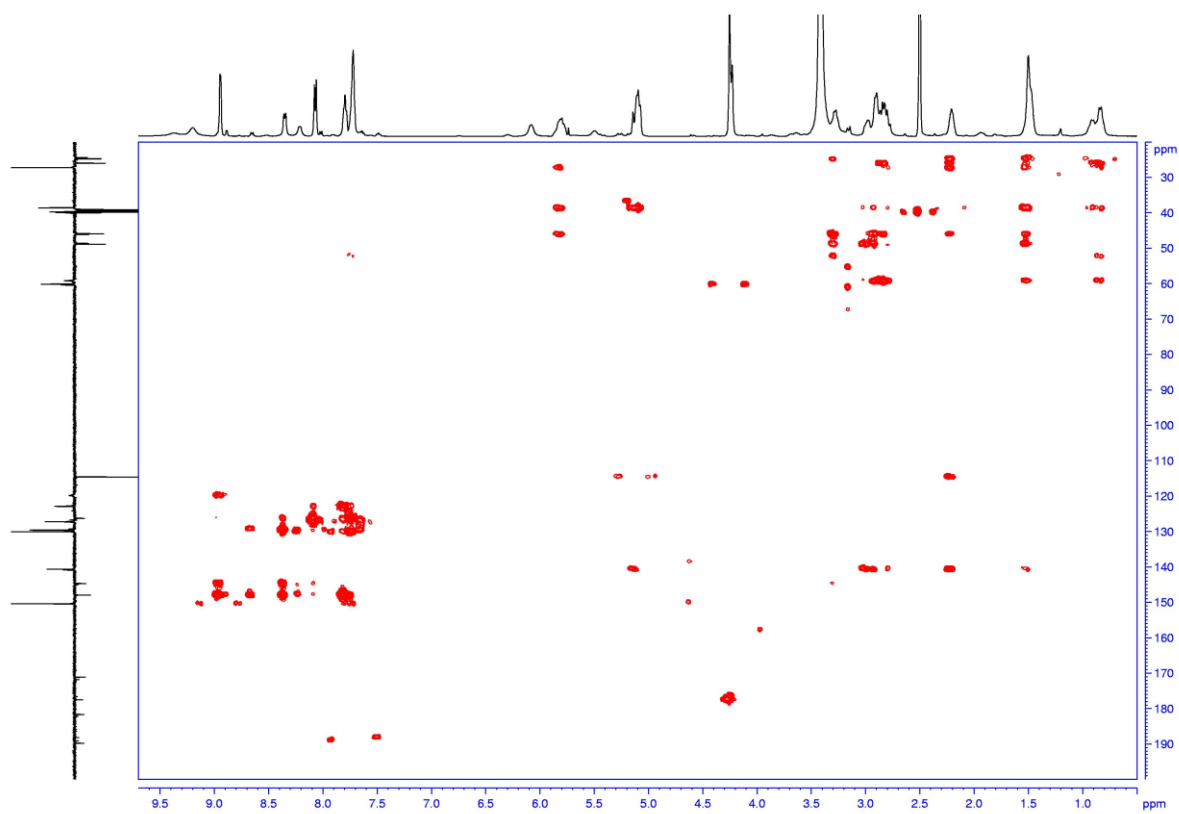

**Figure S6.**  $^1\text{H}$ ,  $^{13}\text{C}$ -gs-HMBC NMR spectrum of intermediate **C-HSQ** ( $\text{DMSO-d}_6$ )

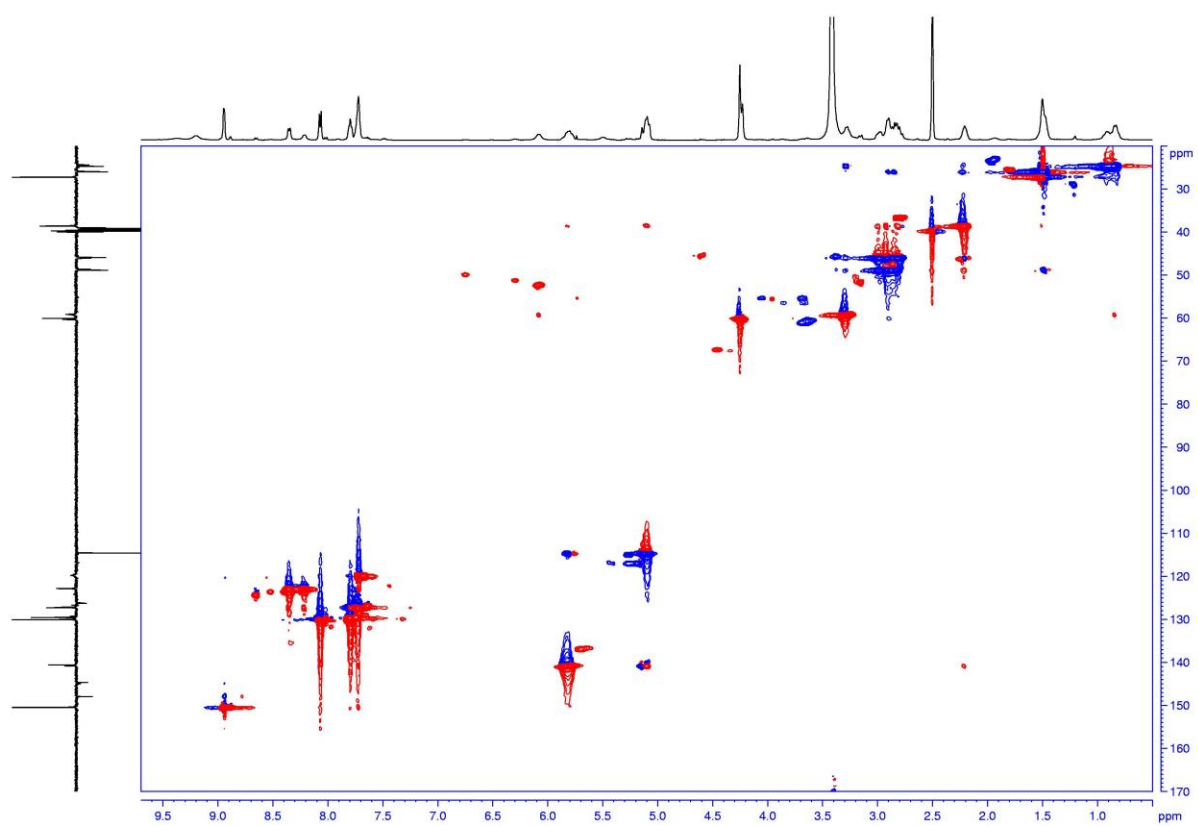

**Figure S7.**  $^1\text{H}$ ,  $^{13}\text{C}$ -gs-HSQC NMR spectrum of intermediate **C-HSQ** ( $\text{DMSO-d}_6$ )

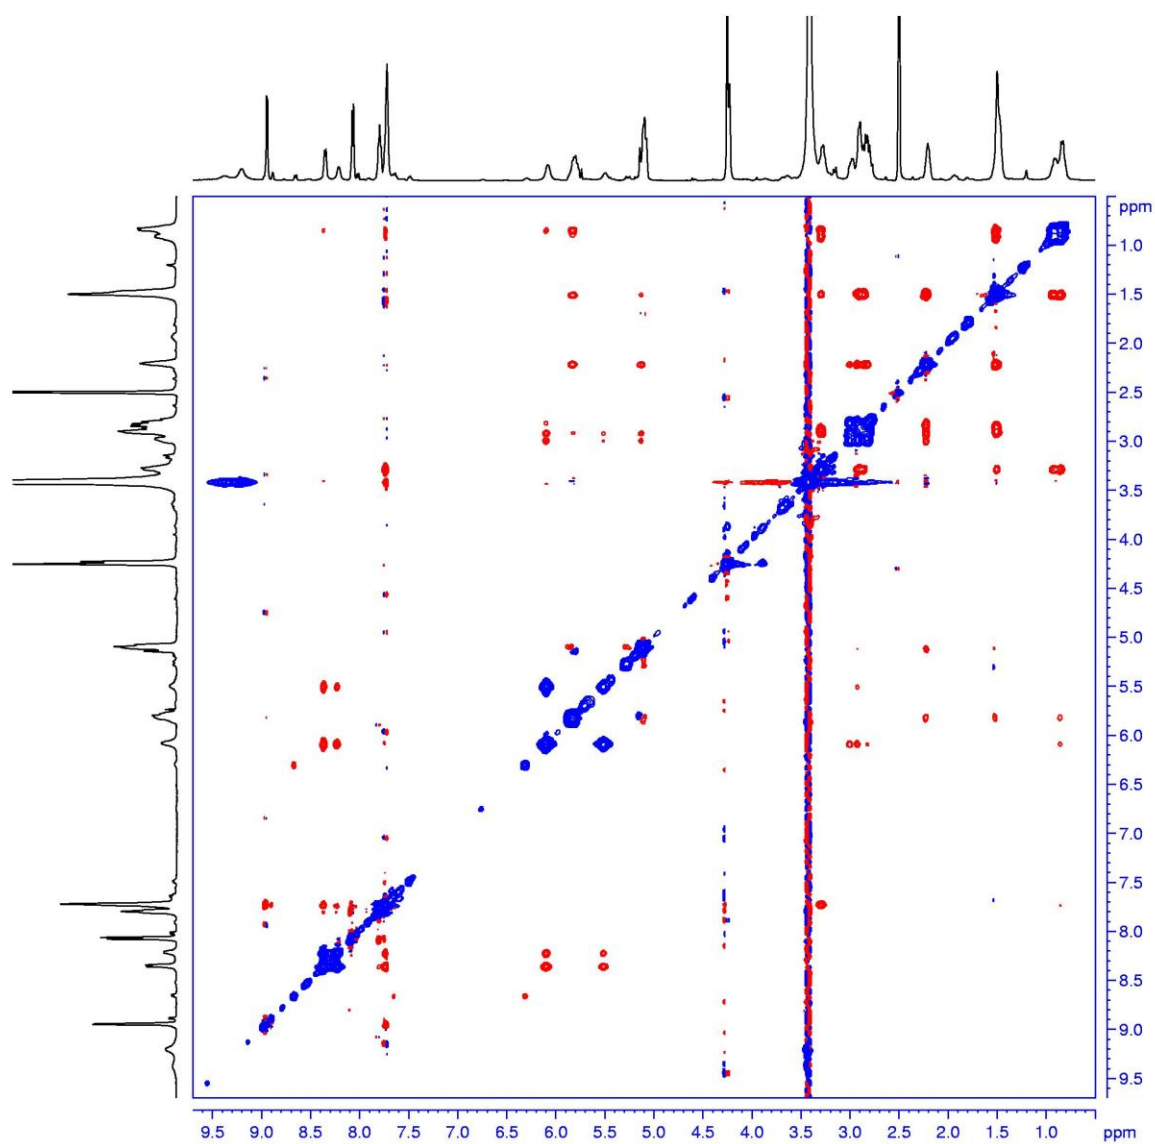

**Figure S8.**  $^1\text{H}$ ,  $^1\text{H}$ -gs-ROESY NMR spectrum of intermediate **C-HSQ** ( $\text{DMSO-d}_6$ )

## NMR spectra of catalyst **C5**

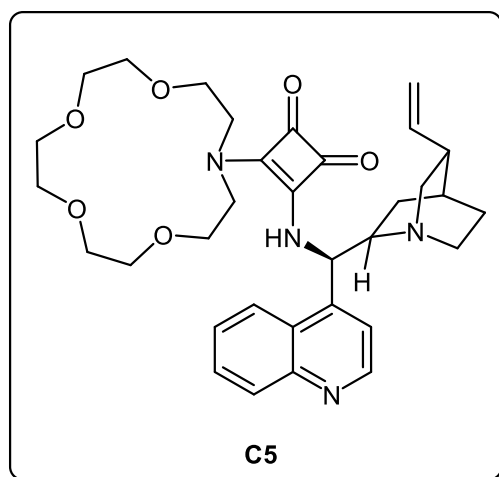

**Figure S9.** Molecule structure of catalyst **C5**

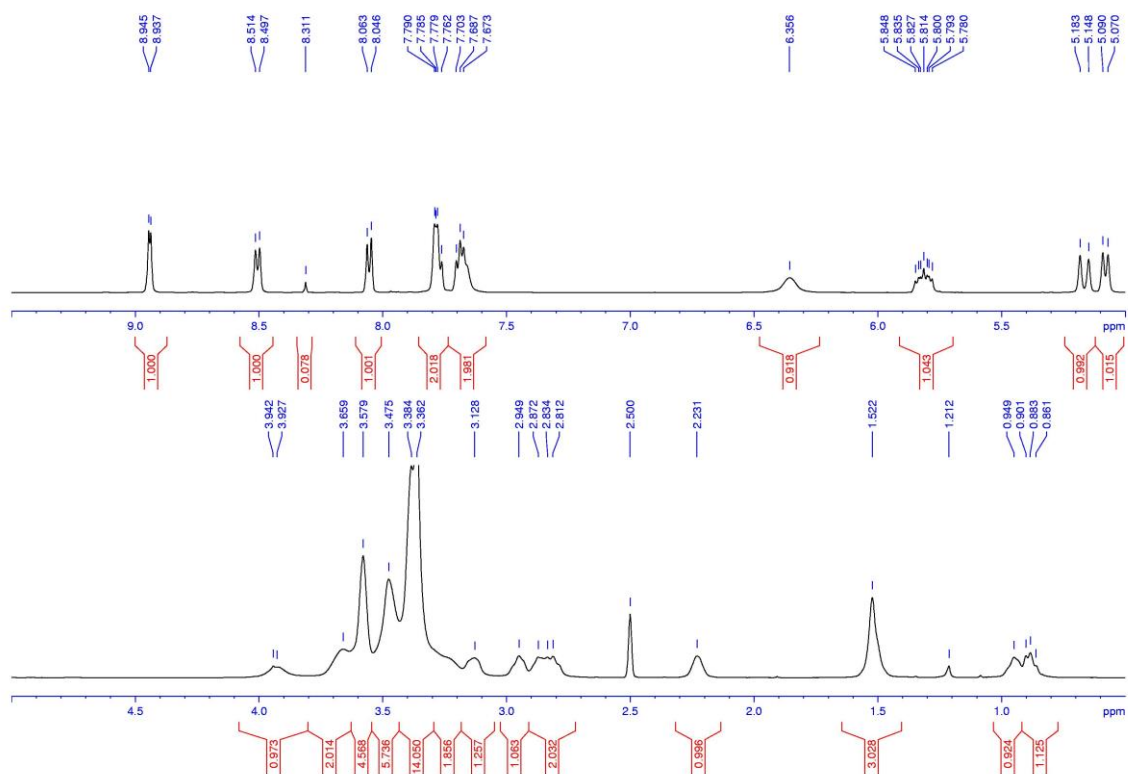

**Figure S10.**  $^1\text{H}$  NMR spectrum of catalyst **C5** (500.13 MHz,  $\text{DMSO-d}_6$ )



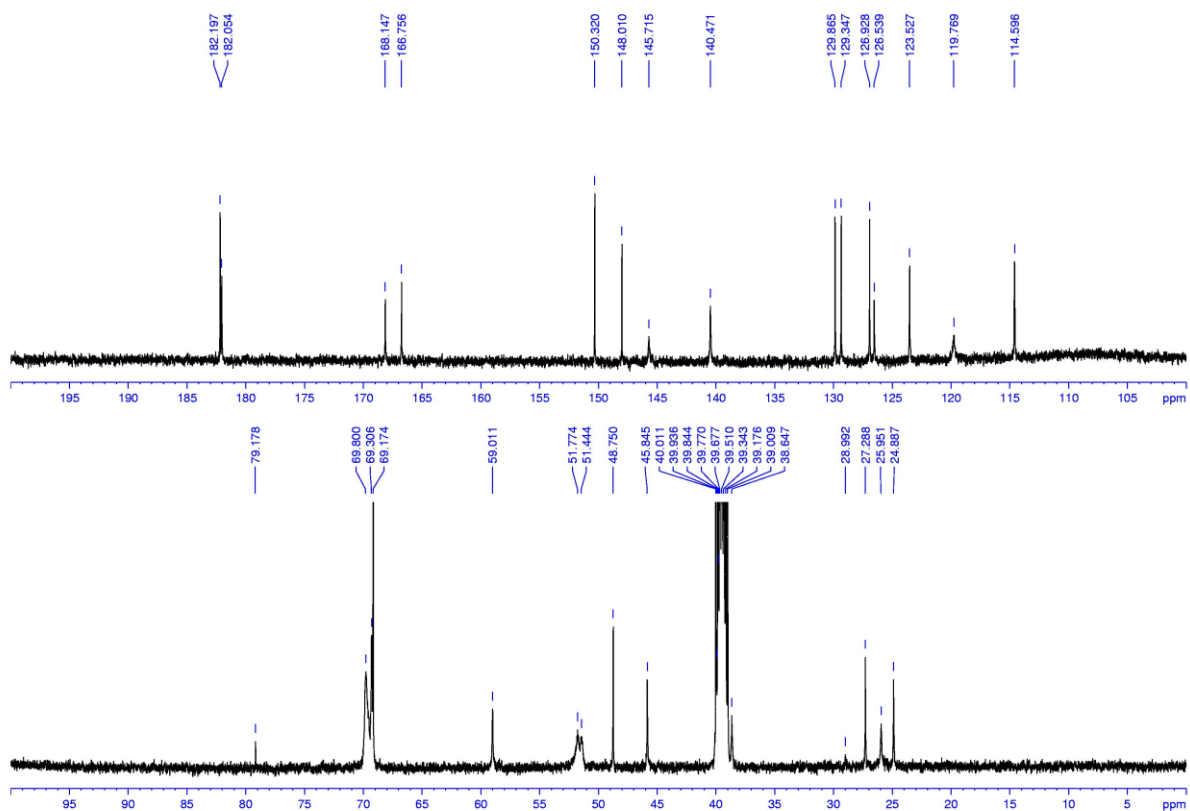

**Figure S11.**  $^{13}\text{C}$  NMR spectrum of catalyst **C5** (125.76 MHz,  $\text{DMSO-d}_6$ )

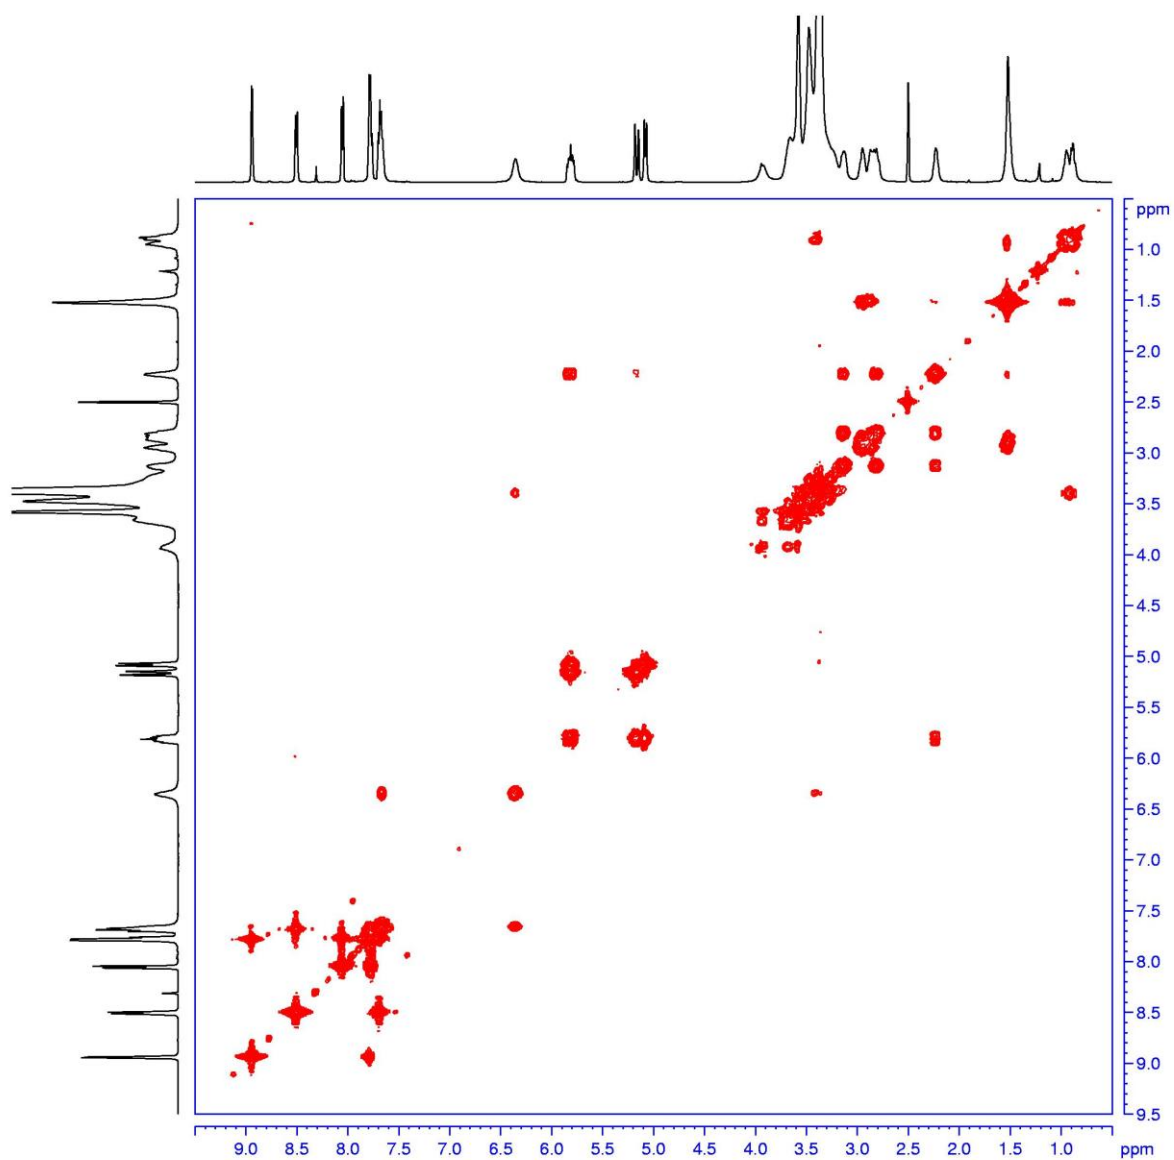

**Figure S12.**  $^1\text{H}$ -gs-COSY NMR spectrum of catalyst **C5** ( $\text{DMSO-d}_6$ )

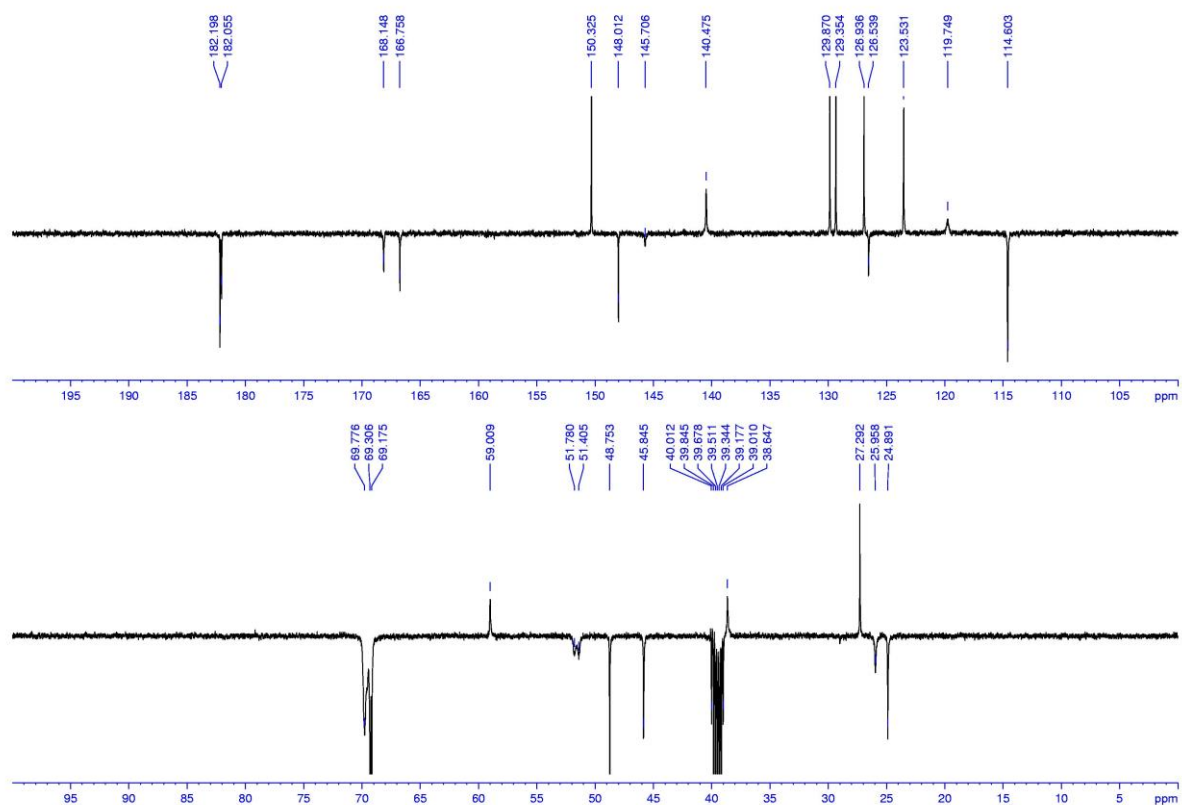

**Figure S13.**  $^{13}\text{C}$  DEPTQ NMR spectrum of catalyst **C5** ( $\text{DMSO-d}_6$ )

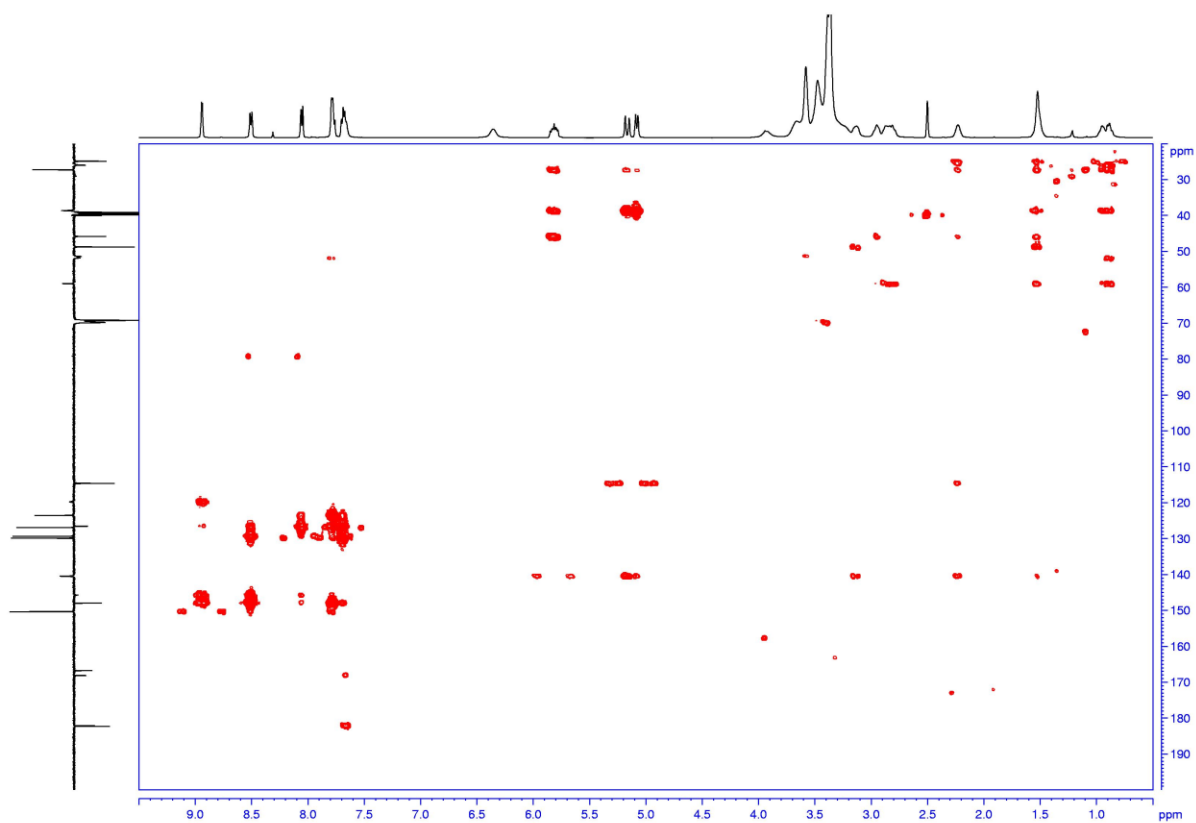

**Figure S14.**  $^1\text{H}$ ,  $^{13}\text{C}$ -gs-HMBC NMR spectrum of catalyst **C5** ( $\text{DMSO-d}_6$ )

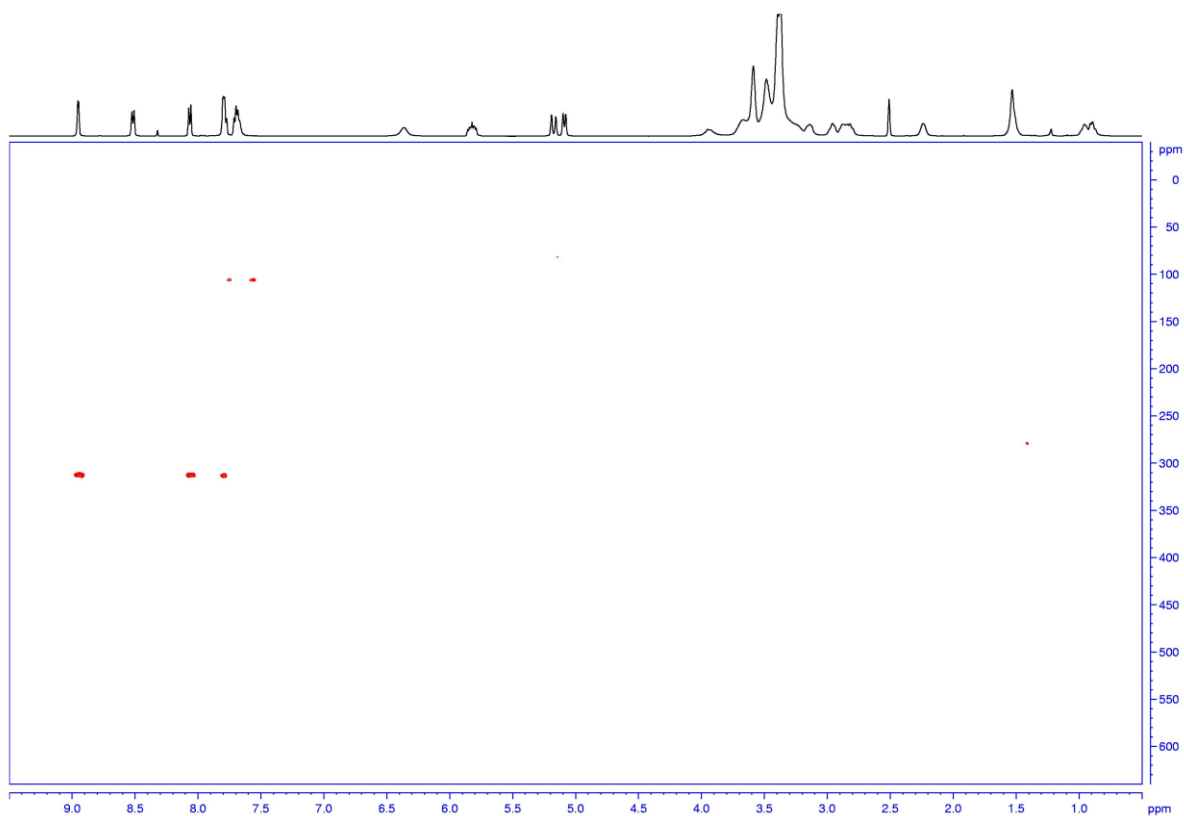

**Figure S15.**  $^1\text{H}$ ,  $^{15}\text{N}$ -gs-HMBC NMR spectrum of catalyst **C5** (DMSO- $\text{d}_6$ )

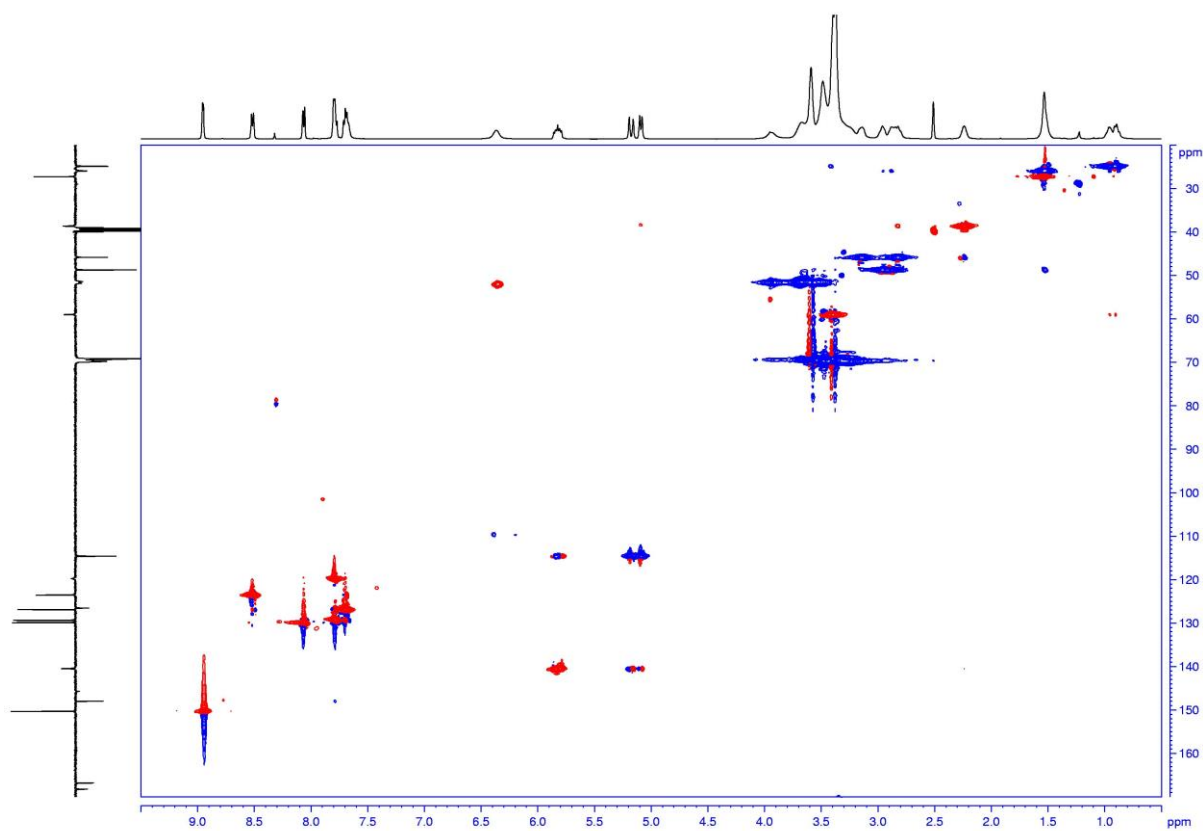

**Figure S16.**  $^1\text{H}$ ,  $^{13}\text{C}$ -gs-HSQC NMR spectrum of intermediate **C5** (DMSO- $\text{d}_6$ )

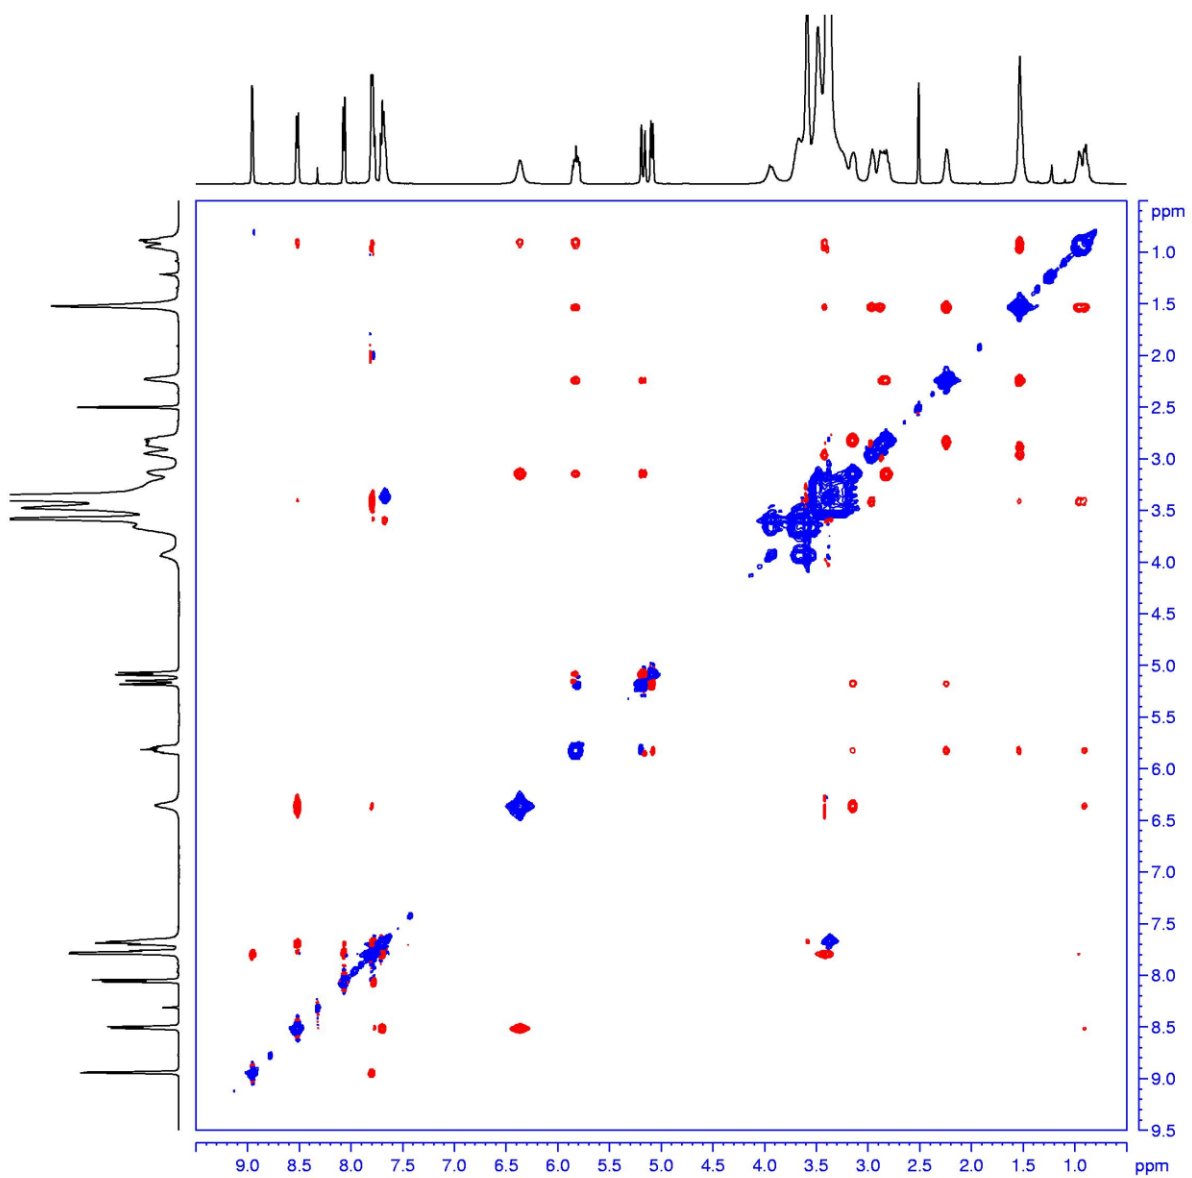

**Figure S17.**  $^1\text{H}$ ,  $^1\text{H}$ -gs-ROESY NMR spectrum of intermediate **C5** ( $\text{DMSO-d}_6$ )

## NMR spectra of catalyst **C6**

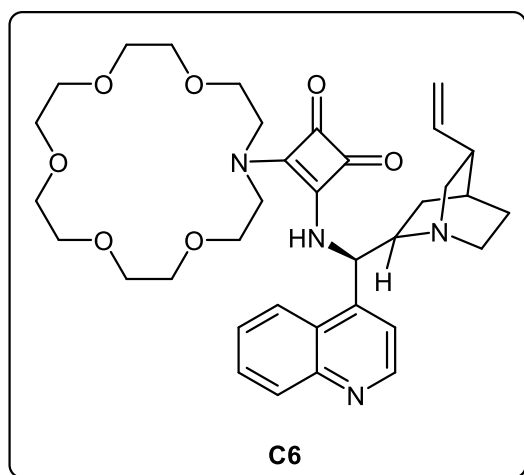

**Figure S18.** Molecule structure of catalyst **C6**

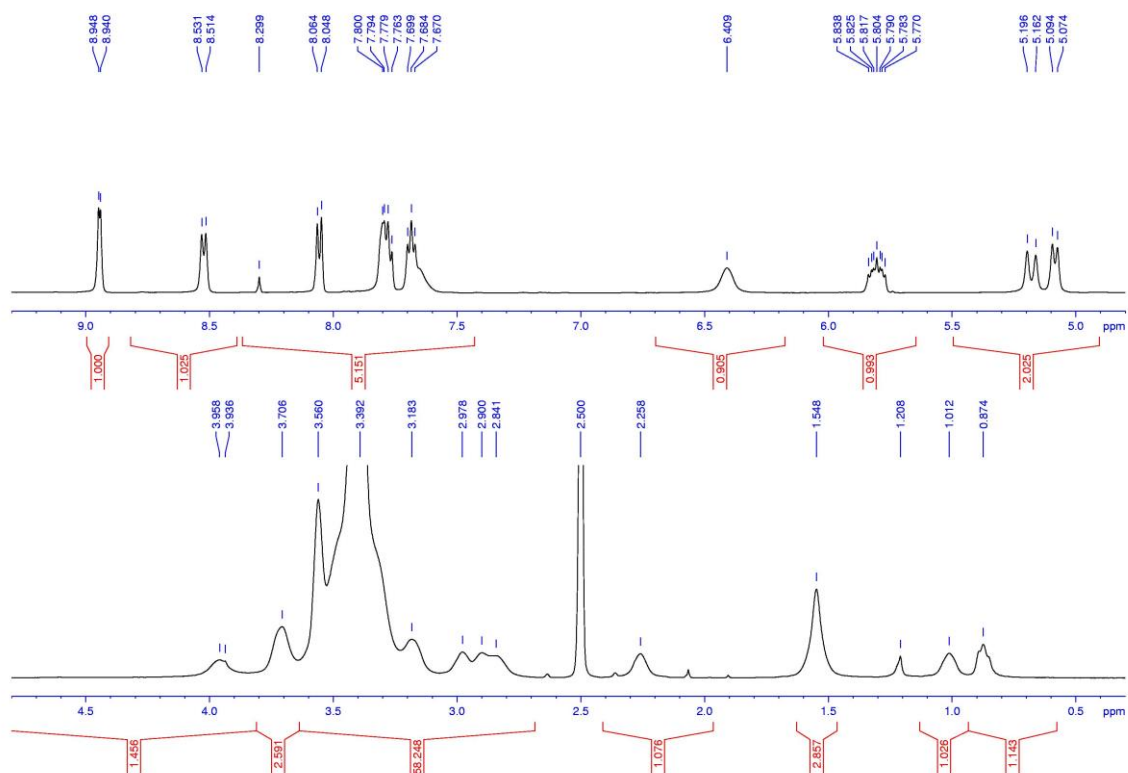

**Figure S19.**  $^1\text{H}$  NMR spectrum of catalyst **C6** (500.13 MHz,  $\text{DMSO-d}_6$ )

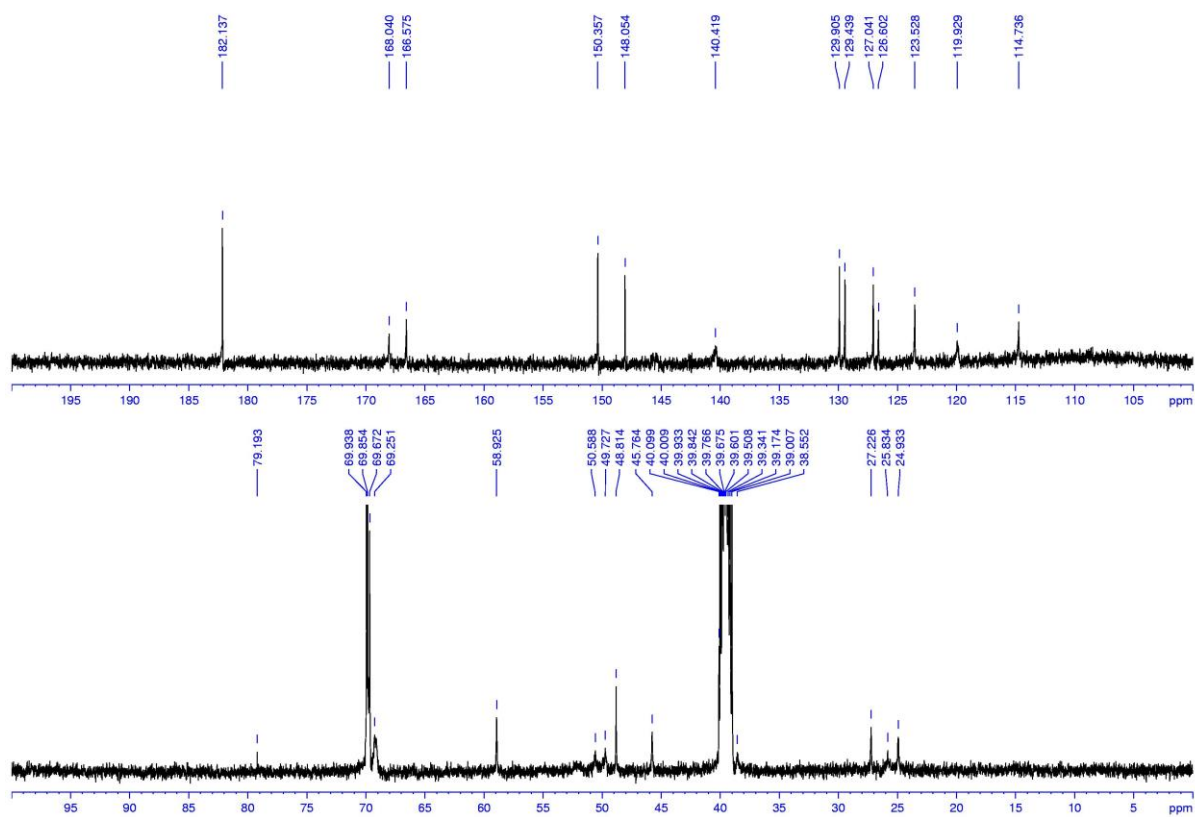

**Figure S20.**  $^{13}\text{C}$  NMR spectrum of catalyst **C6** (125.76 MHz,  $\text{DMSO-d}_6$ )

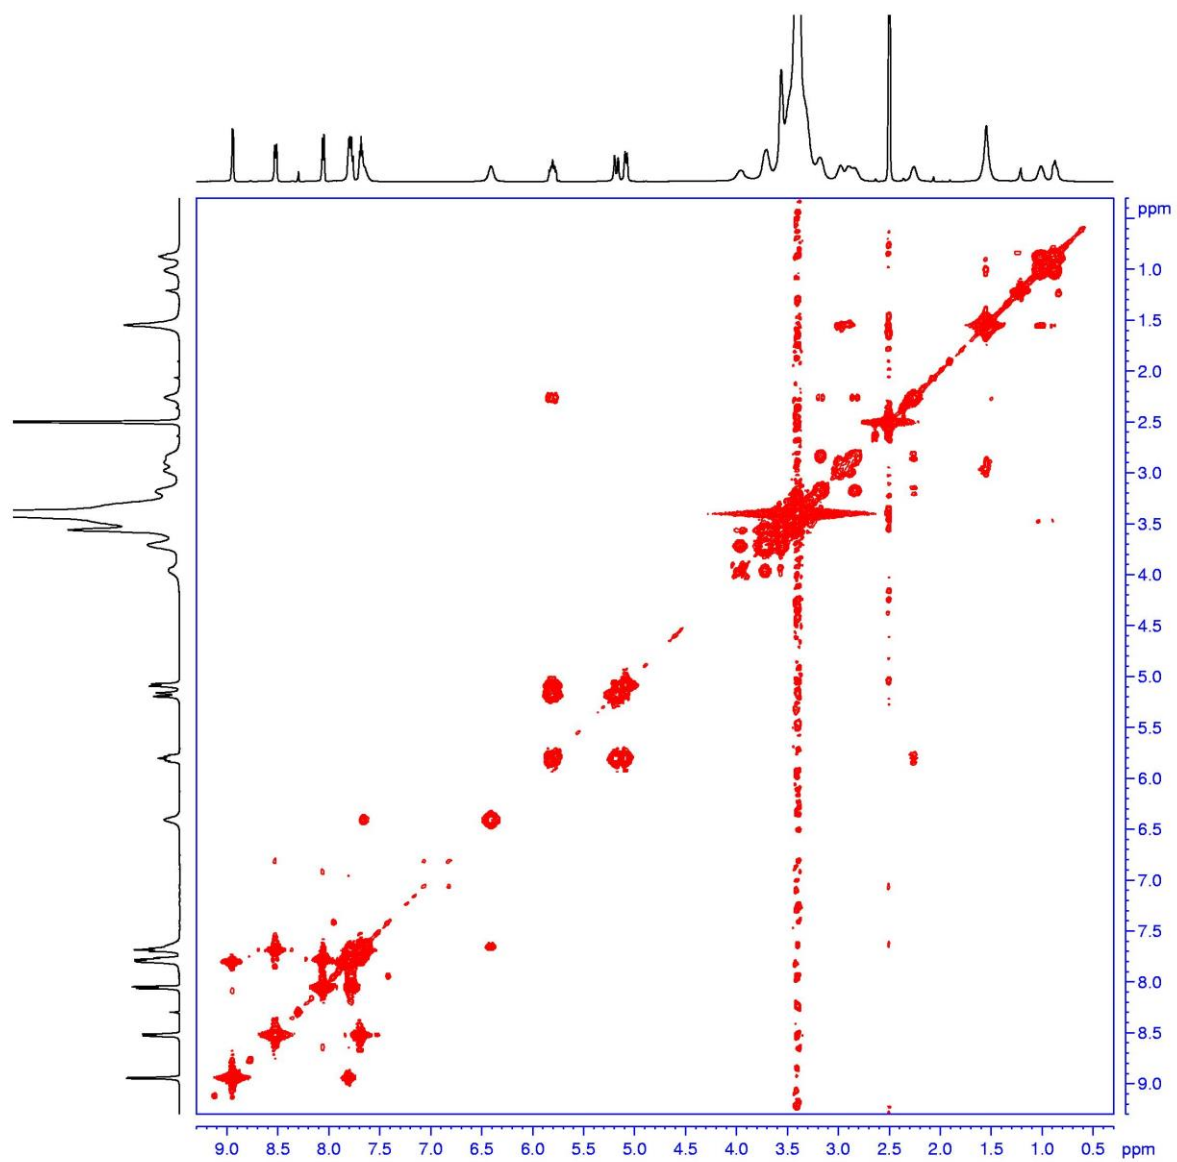

**Figure S21.**  $^1\text{H}$ -gs-COSY NMR spectrum of catalyst **C6** ( $\text{DMSO-d}_6$ )



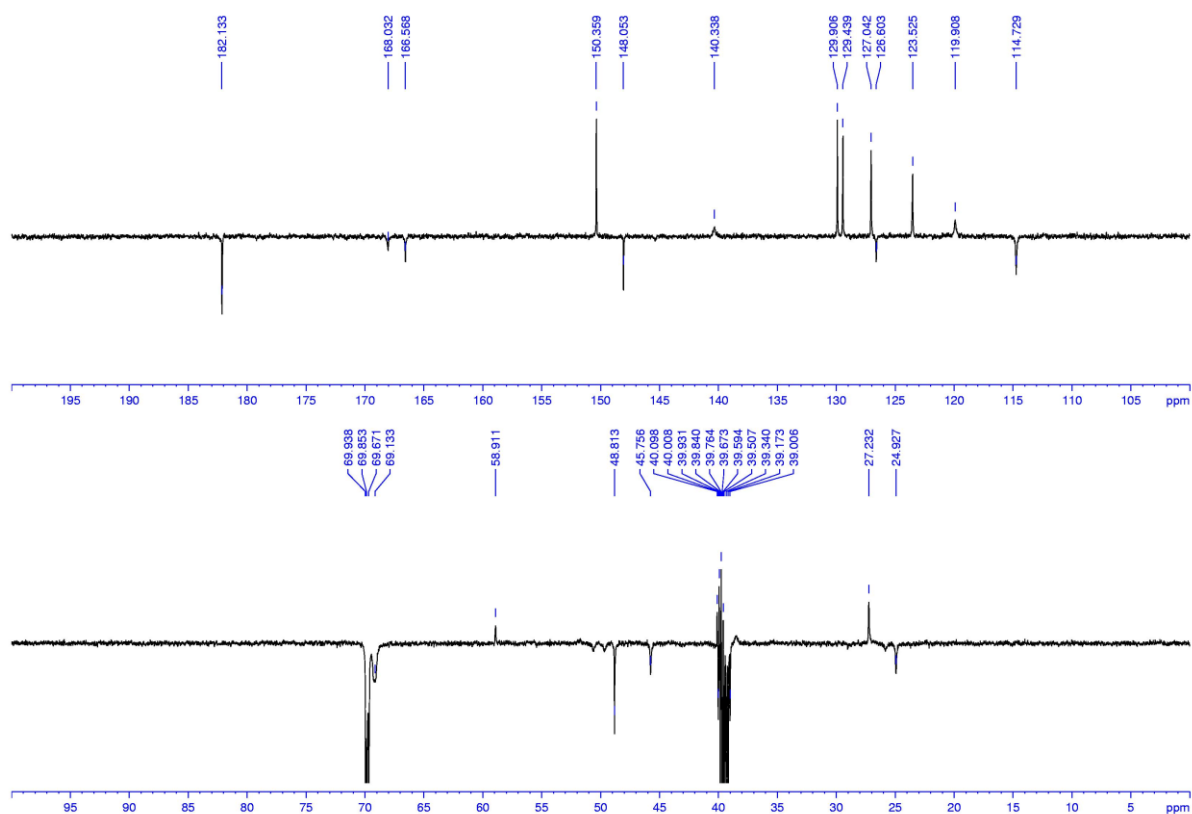

Figure S22.  $^{13}\text{C}$  DEPTQ NMR spectrum of catalyst C6 (DMSO- $\text{d}_6$ )

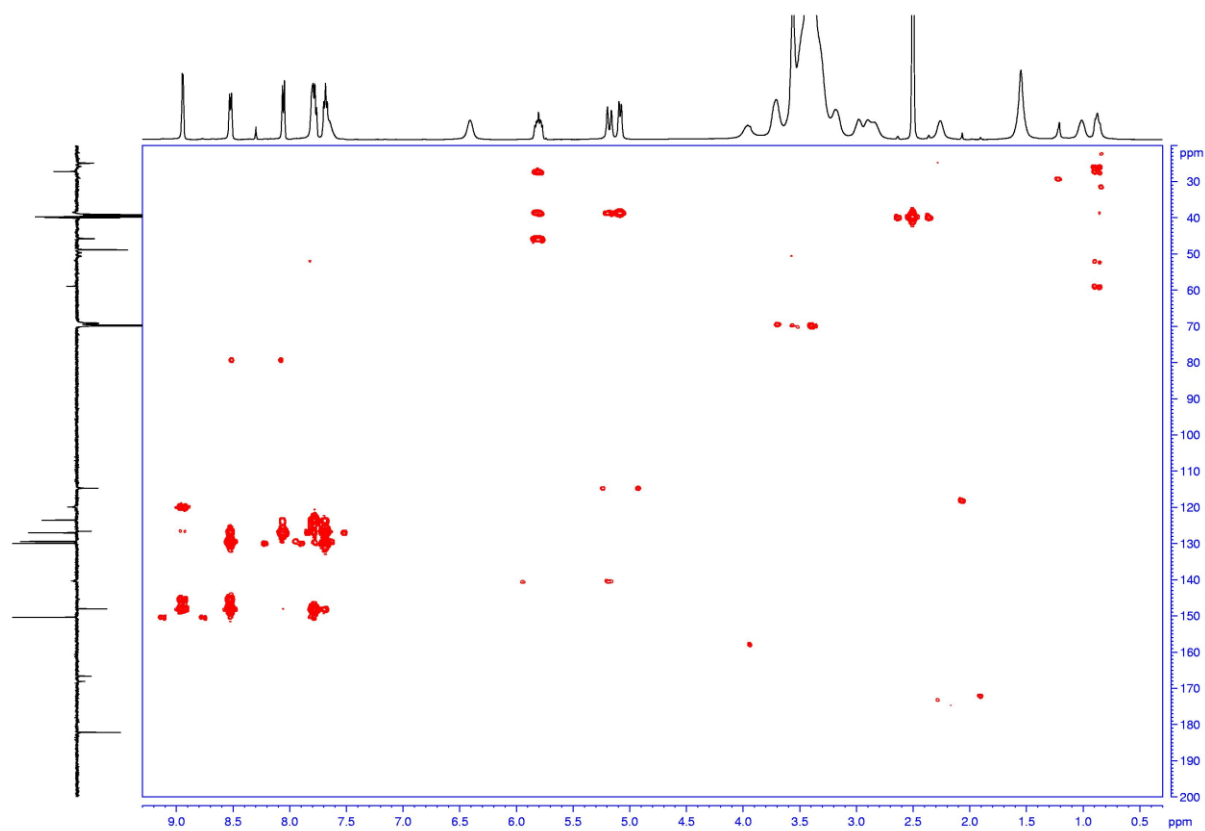

Figure S23.  $^1\text{H}$ ,  $^{13}\text{C}$ -gs-HMBC NMR spectrum of catalyst C6 (DMSO- $\text{d}_6$ )

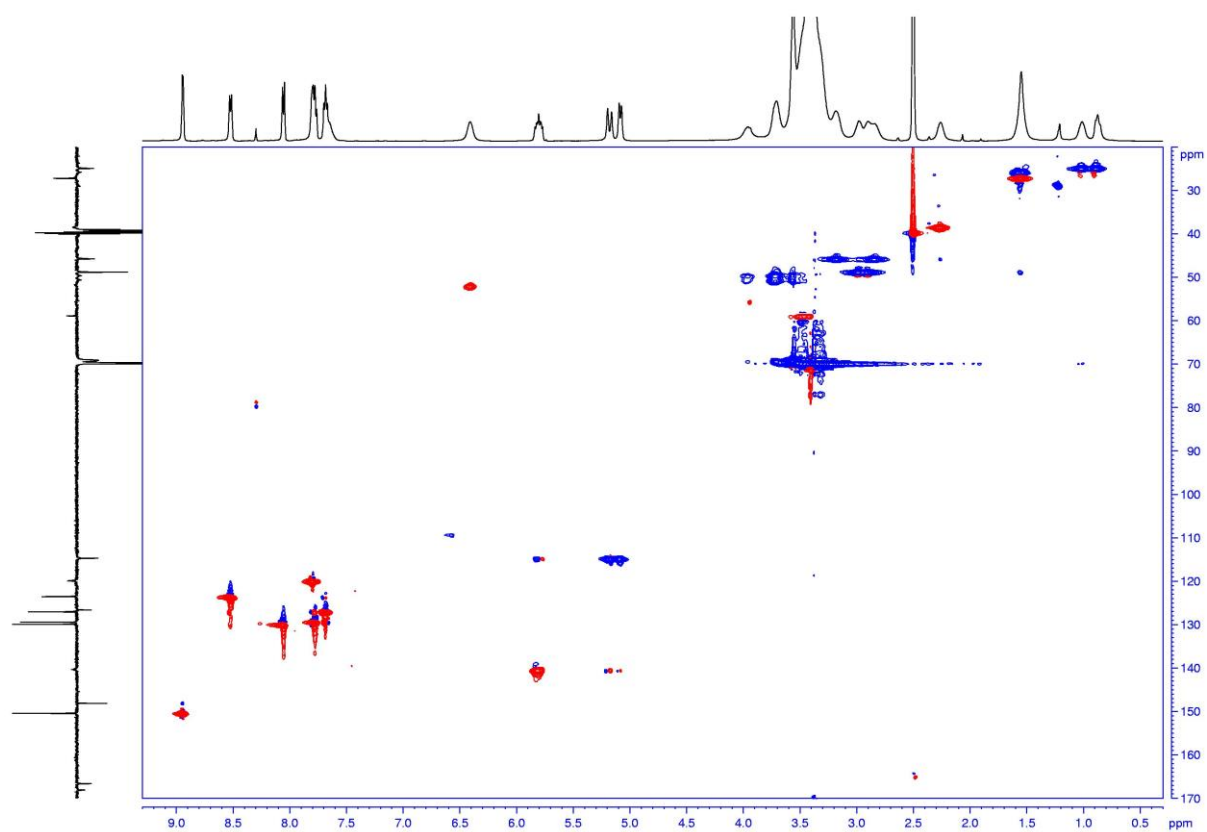

**Figure S24.**  $^1\text{H}$ ,  $^{13}\text{C}$ -gs-HSQC NMR spectrum of intermediate **C6** ( $\text{DMSO-d}_6$ )

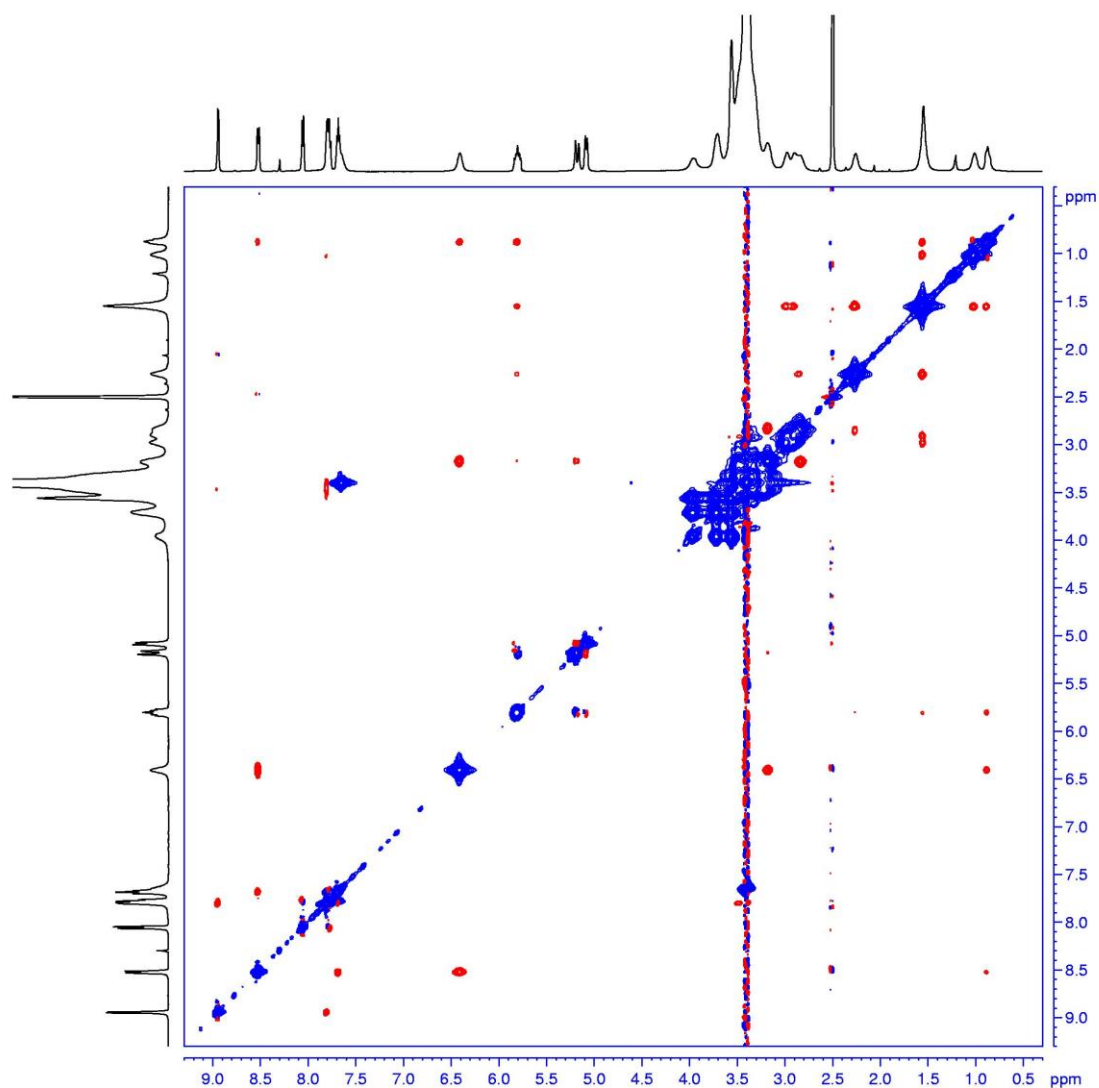

**Figure S25.**  $^1\text{H}$ ,  $^1\text{H}$ -gs-ROESY NMR spectrum of intermediate **C6** ( $\text{DMSO-d}_6$ )

NMR spectra of catalyst **Q5**

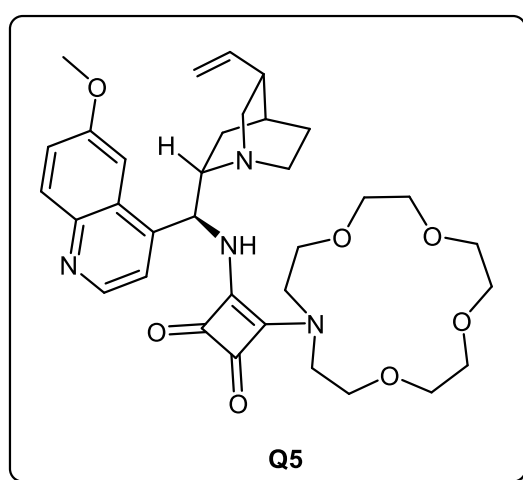

**Figure S26.** Molecule structure of catalyst **Q5**

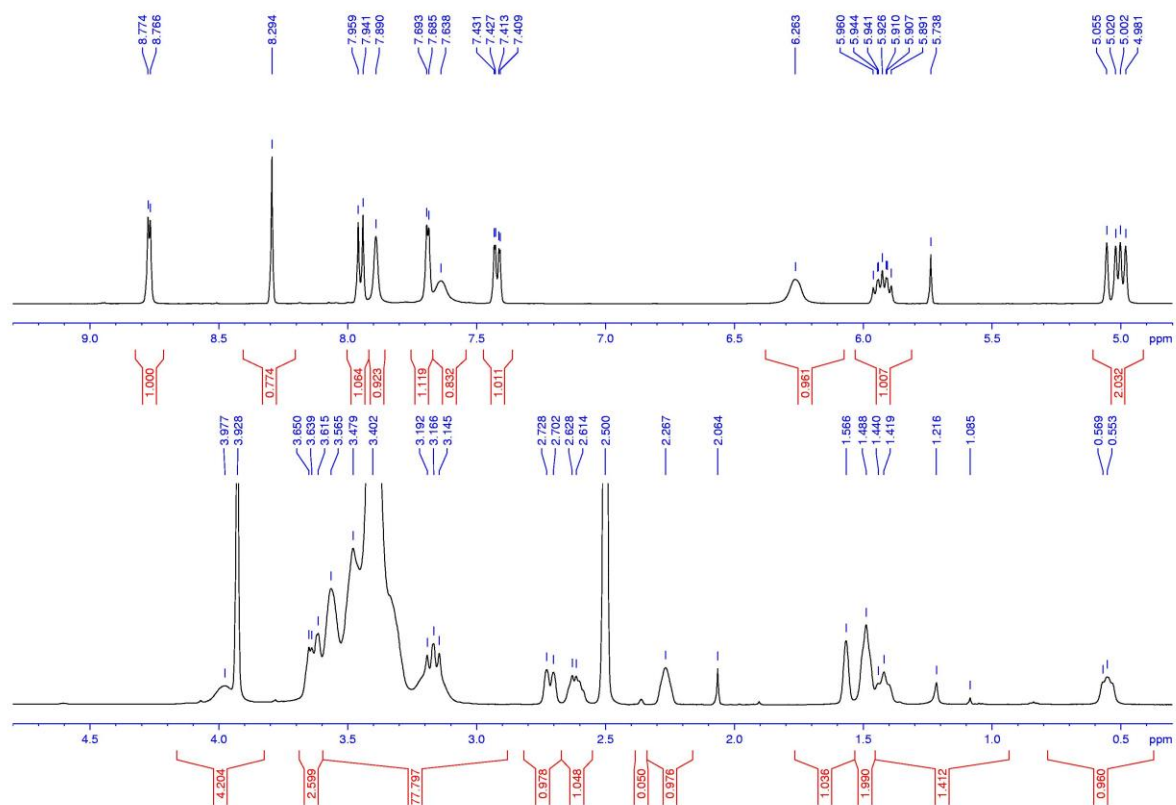

**Figure S27.** <sup>1</sup>H NMR spectrum of catalyst **Q5** (500.13 MHz, DMSO-d<sub>6</sub>)

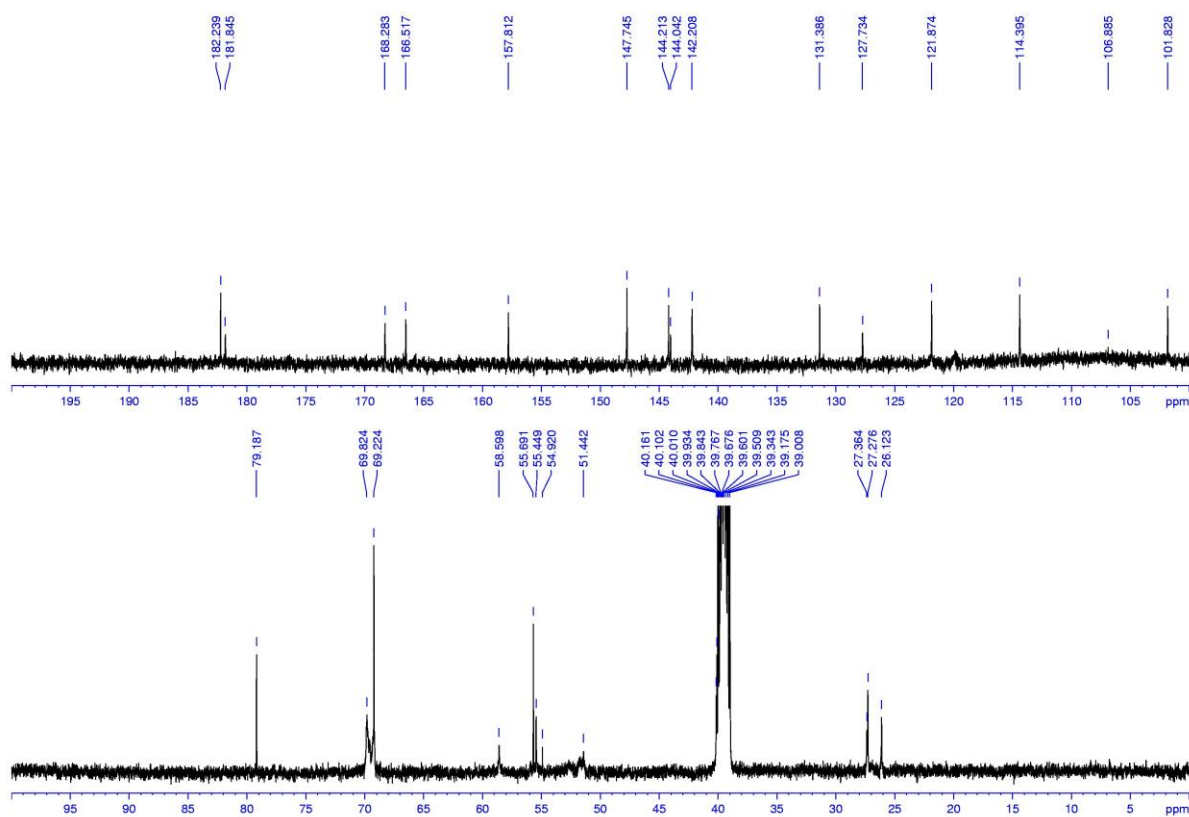

**Figure S28.** <sup>13</sup>C NMR spectrum of catalyst **Q5** (125.76 MHz, DMSO-d<sub>6</sub>)

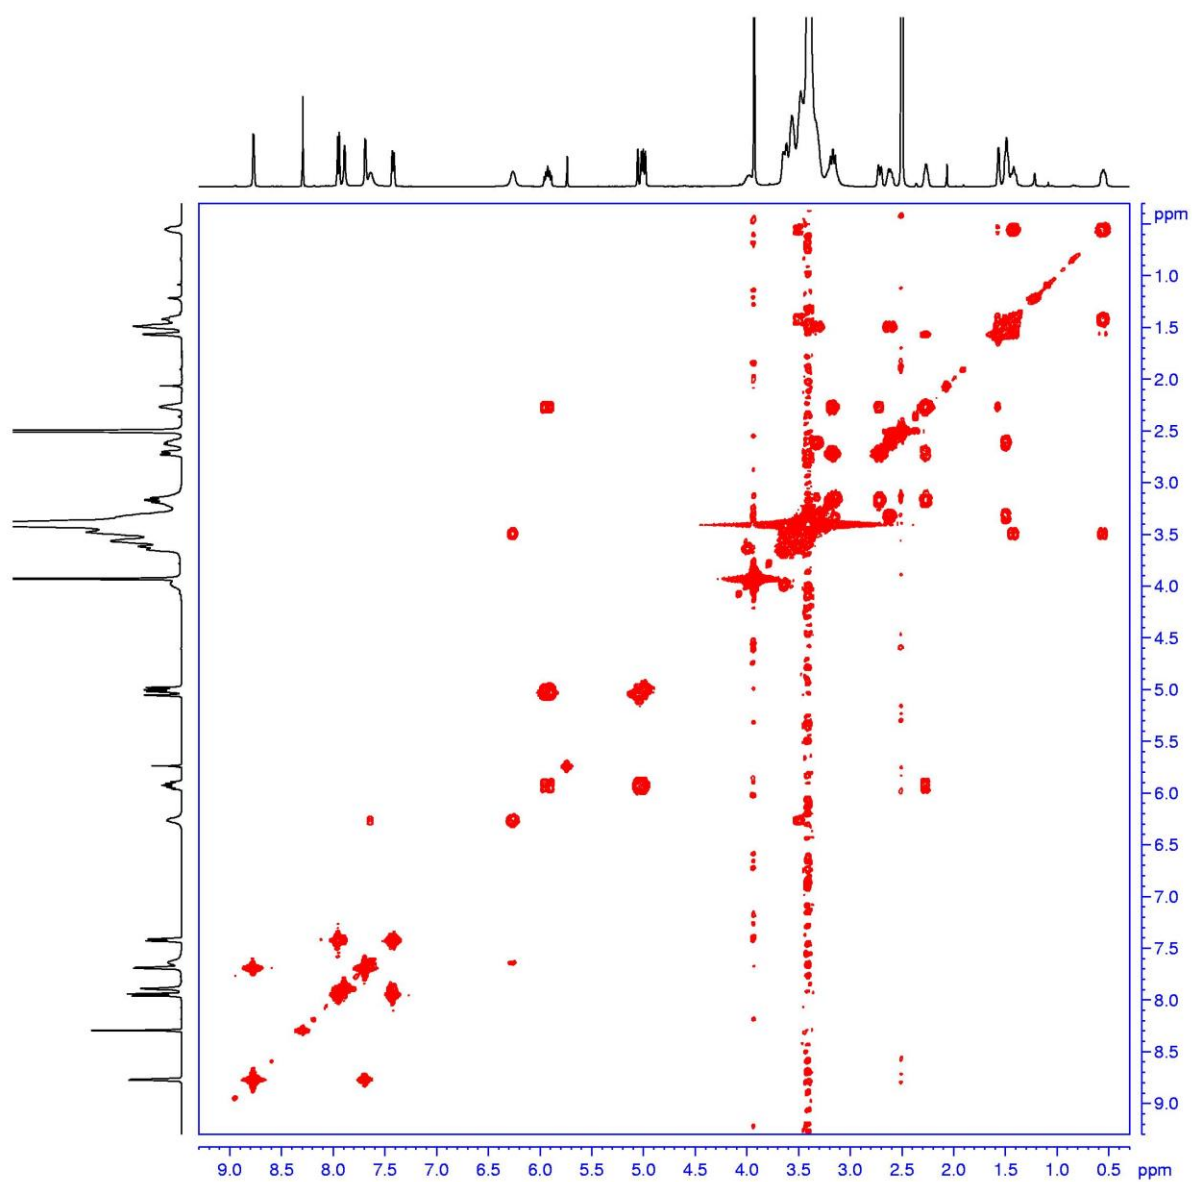

**Figure S29.** <sup>1</sup>H-gs-COSY NMR spectrum of catalyst **Q5** (DMSO-d<sub>6</sub>)

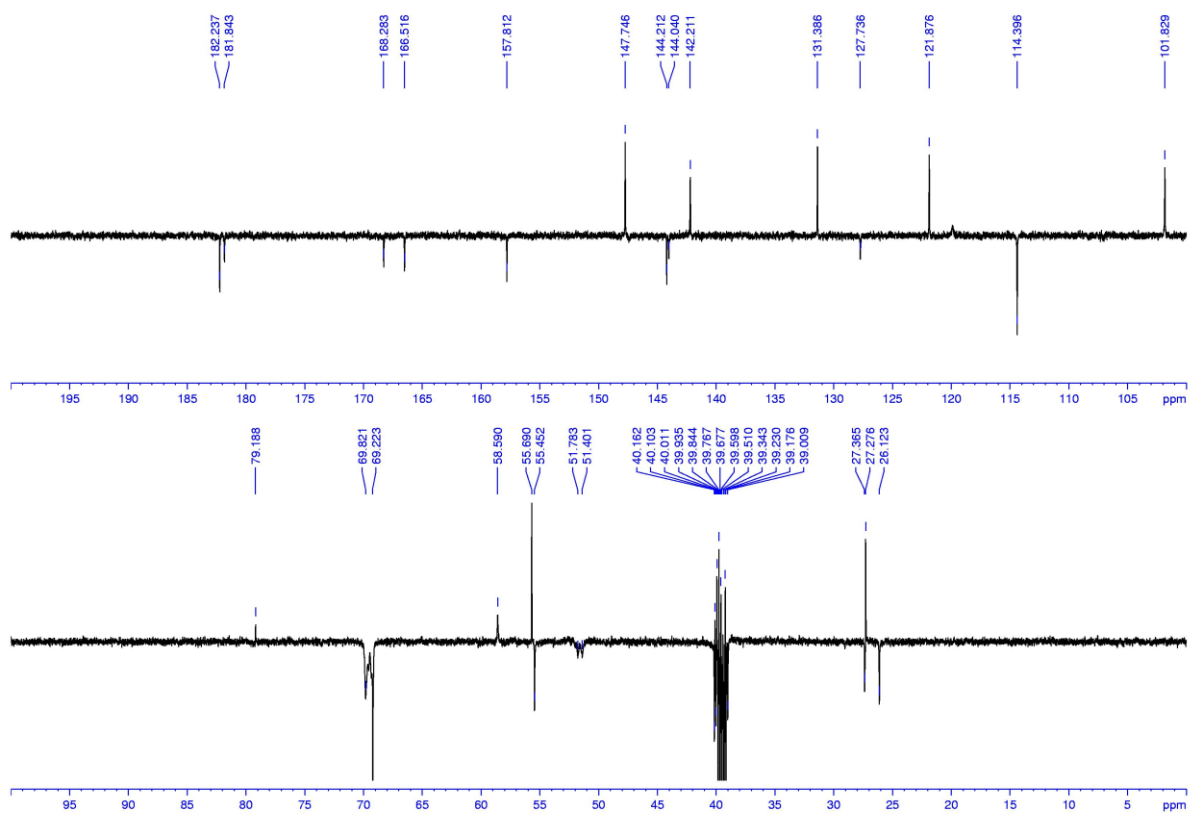

**Figure S30.**  $^{13}\text{C}$  DEPTQ NMR spectrum of catalyst **Q5** ( $\text{DMSO-d}_6$ )

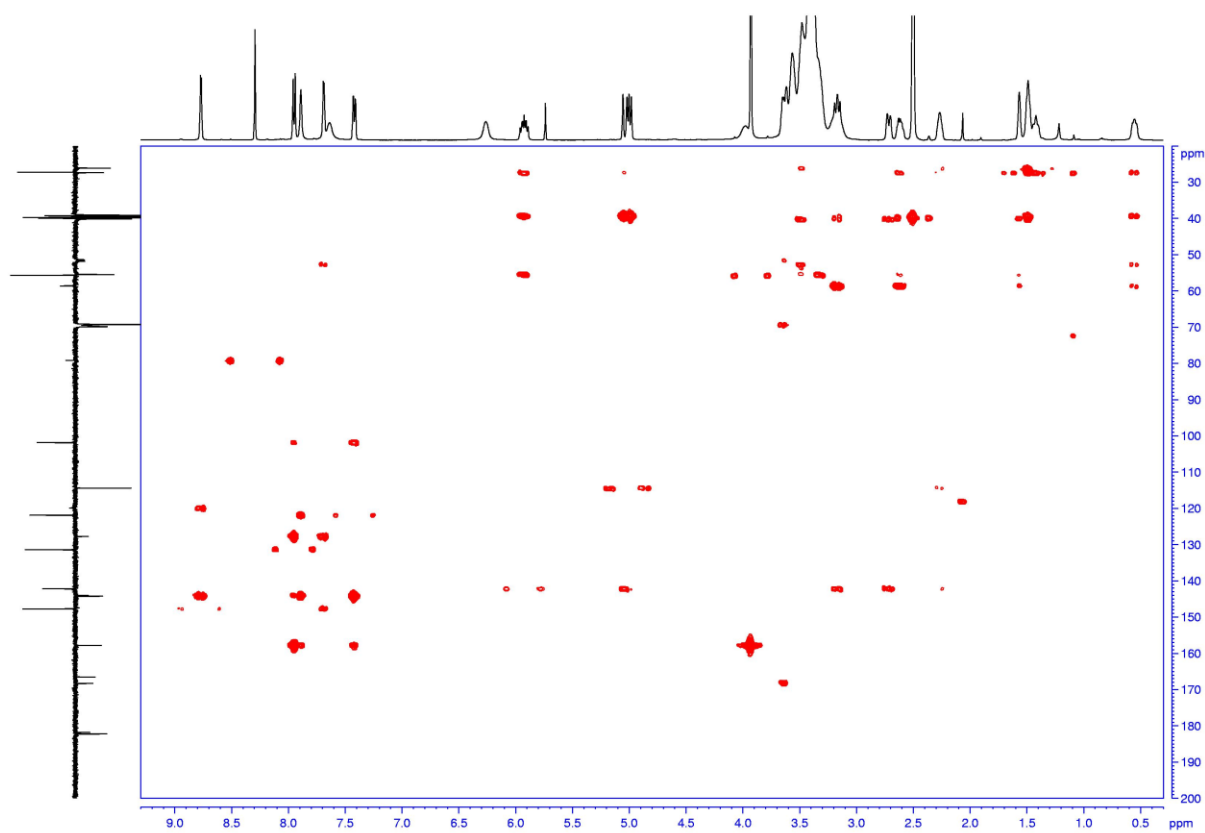

**Figure S31.**  $^1\text{H}$ ,  $^{13}\text{C}$ -gs-HMBC NMR spectrum of catalyst **Q5** ( $\text{DMSO-d}_6$ )

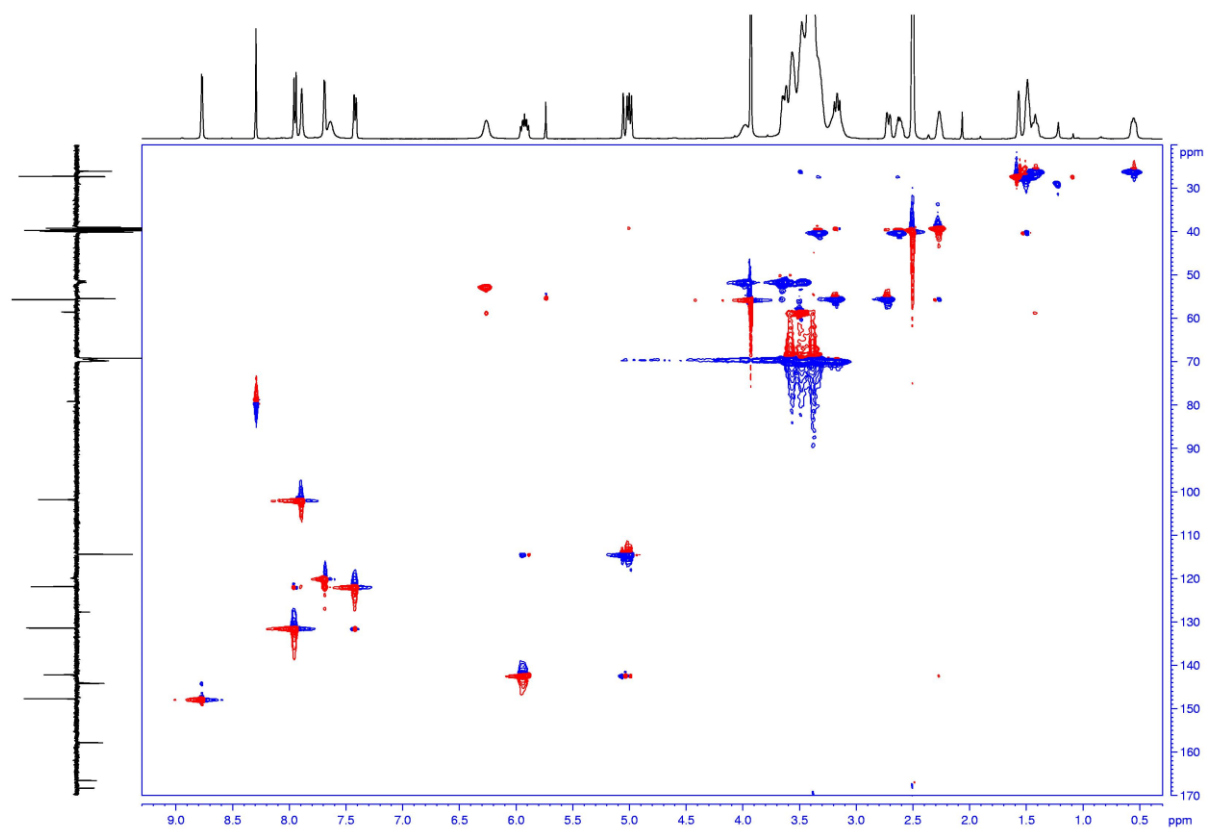

**Figure S32.**  $^1\text{H}$ ,  $^{13}\text{C}$ -gs-HSQC NMR spectrum of intermediate **Q5** ( $\text{DMSO-d}_6$ )

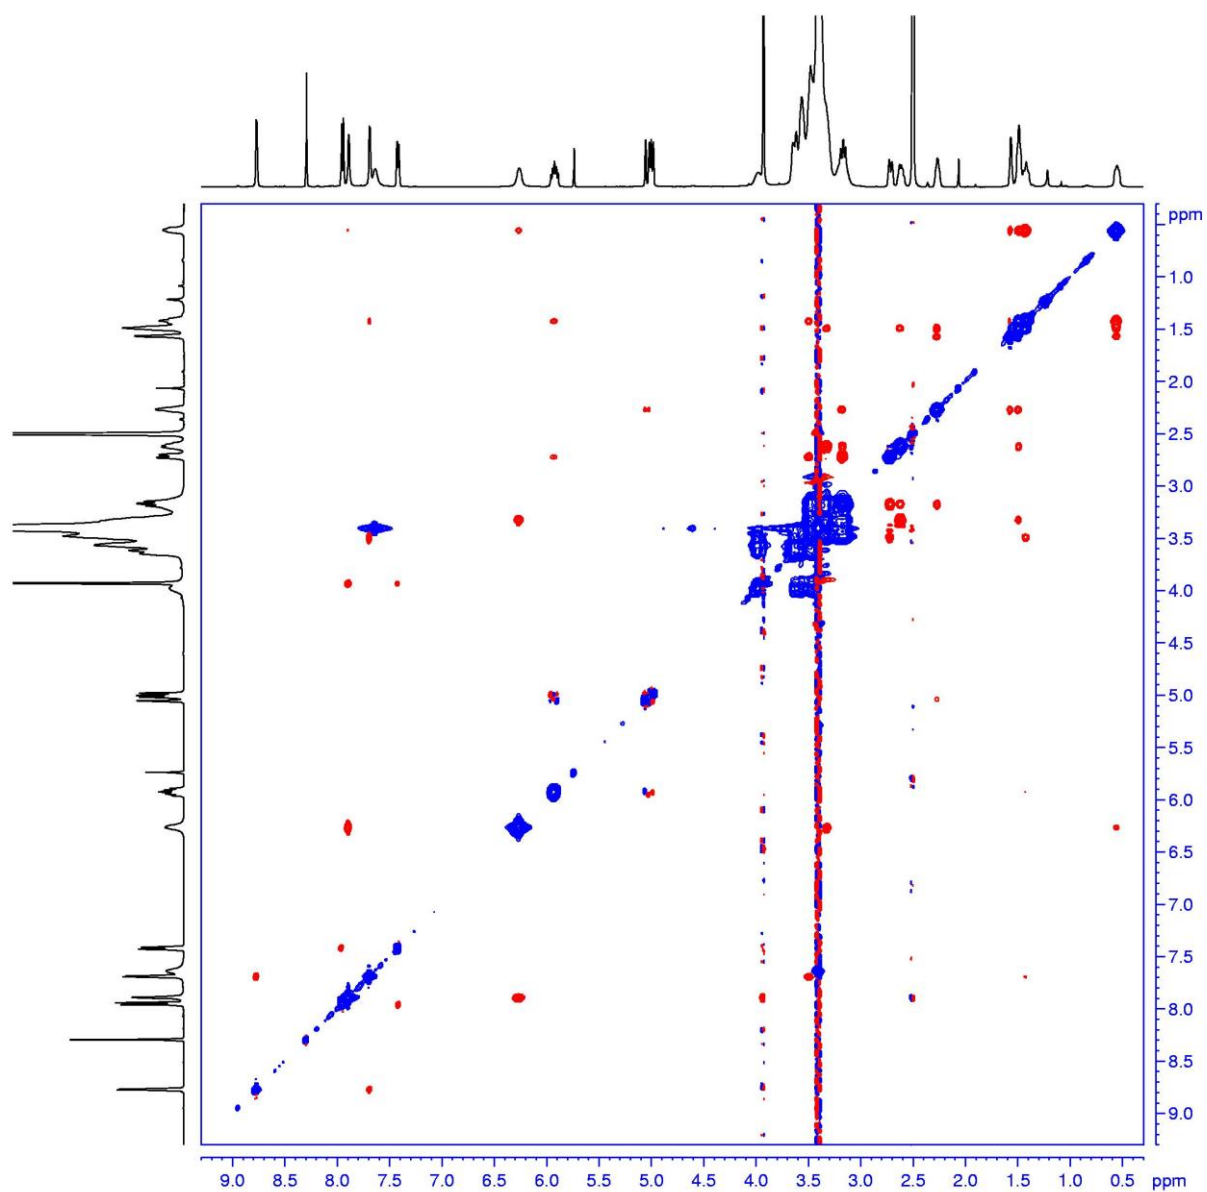

**Figure S33.**  $^1\text{H}$ ,  $^1\text{H}$ -gs-ROESY NMR spectrum of intermediate **Q5** ( $\text{DMSO-d}_6$ )



## NMR spectra of catalyst **Q6**

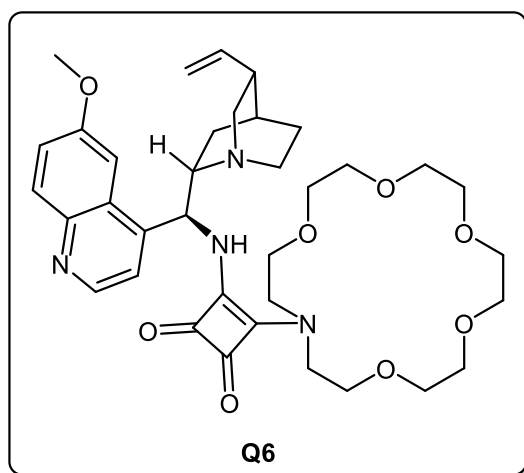

**Figure S34.** Molecule structure of catalyst **Q6**

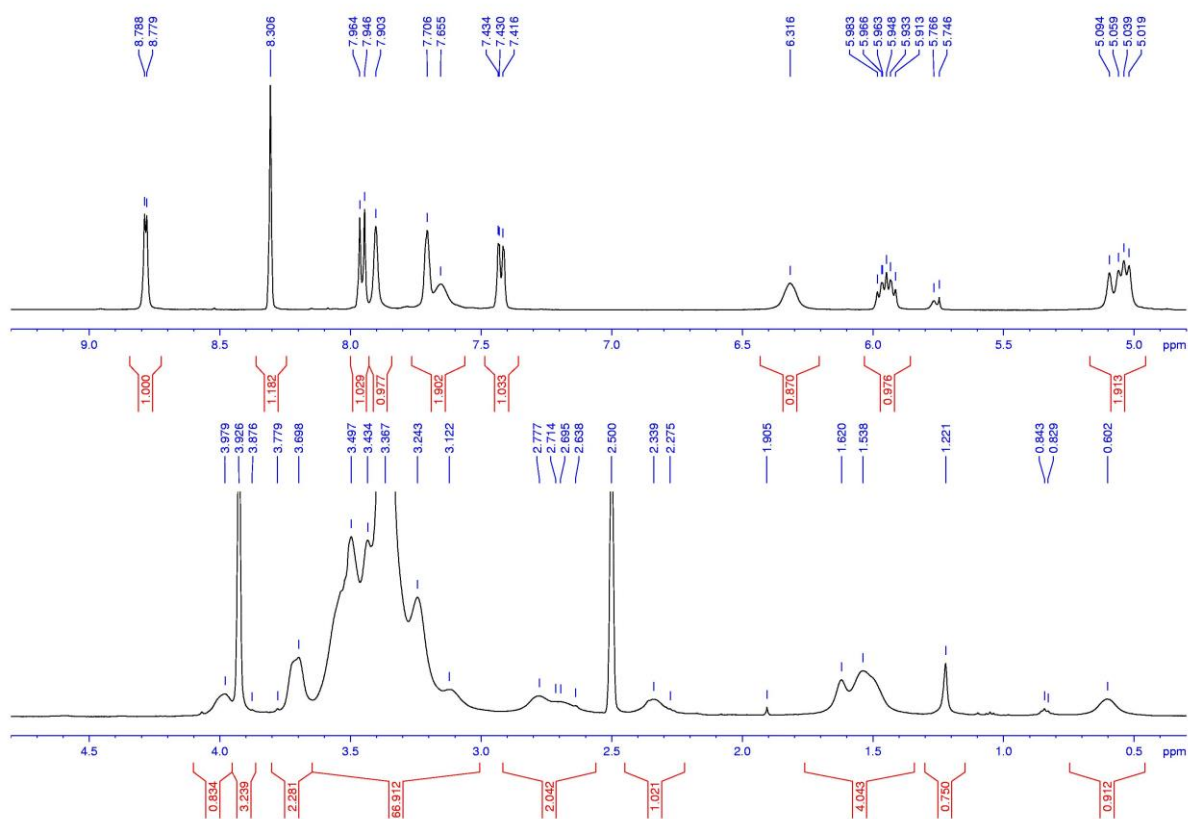

**Figure S35.**  $^1\text{H}$  NMR spectrum of catalyst **Q6** (500.13 MHz,  $\text{DMSO-d}_6$ )

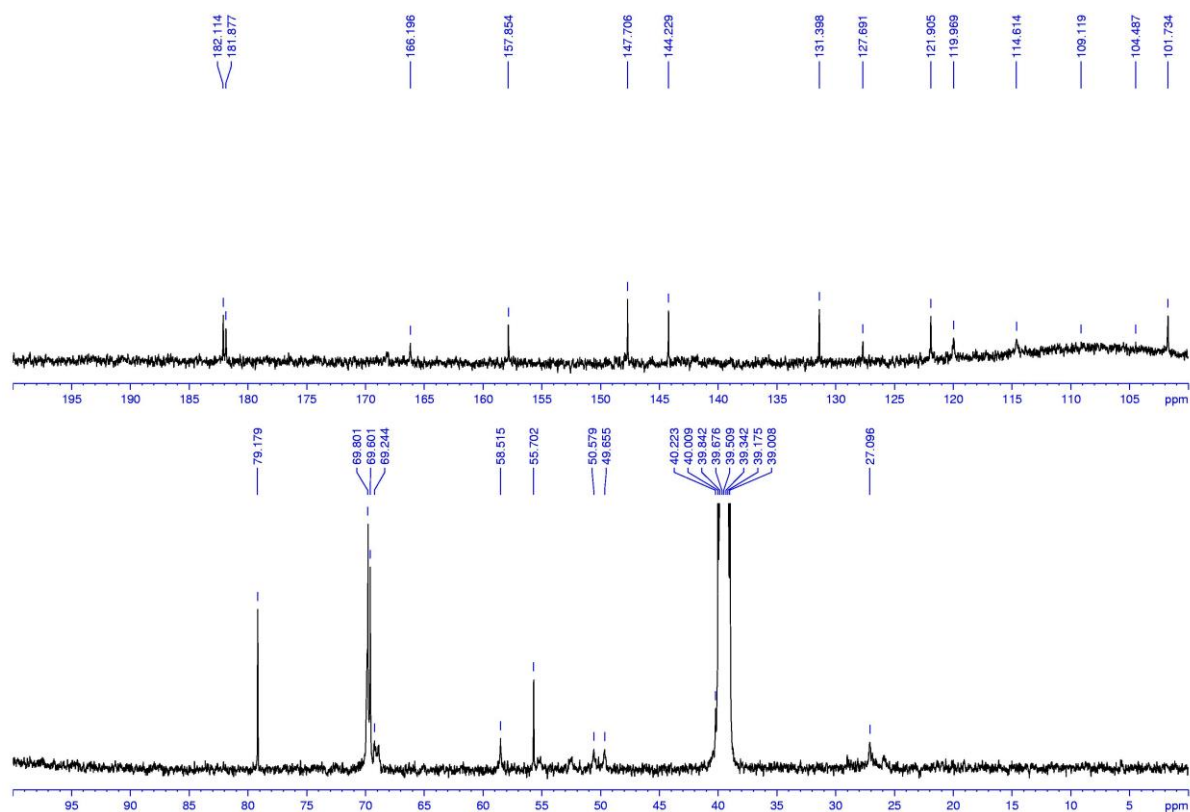

**Figure S36.**  $^{13}\text{C}$  NMR spectrum of catalyst **Q6** (125.76 MHz,  $\text{DMSO-d}_6$ )

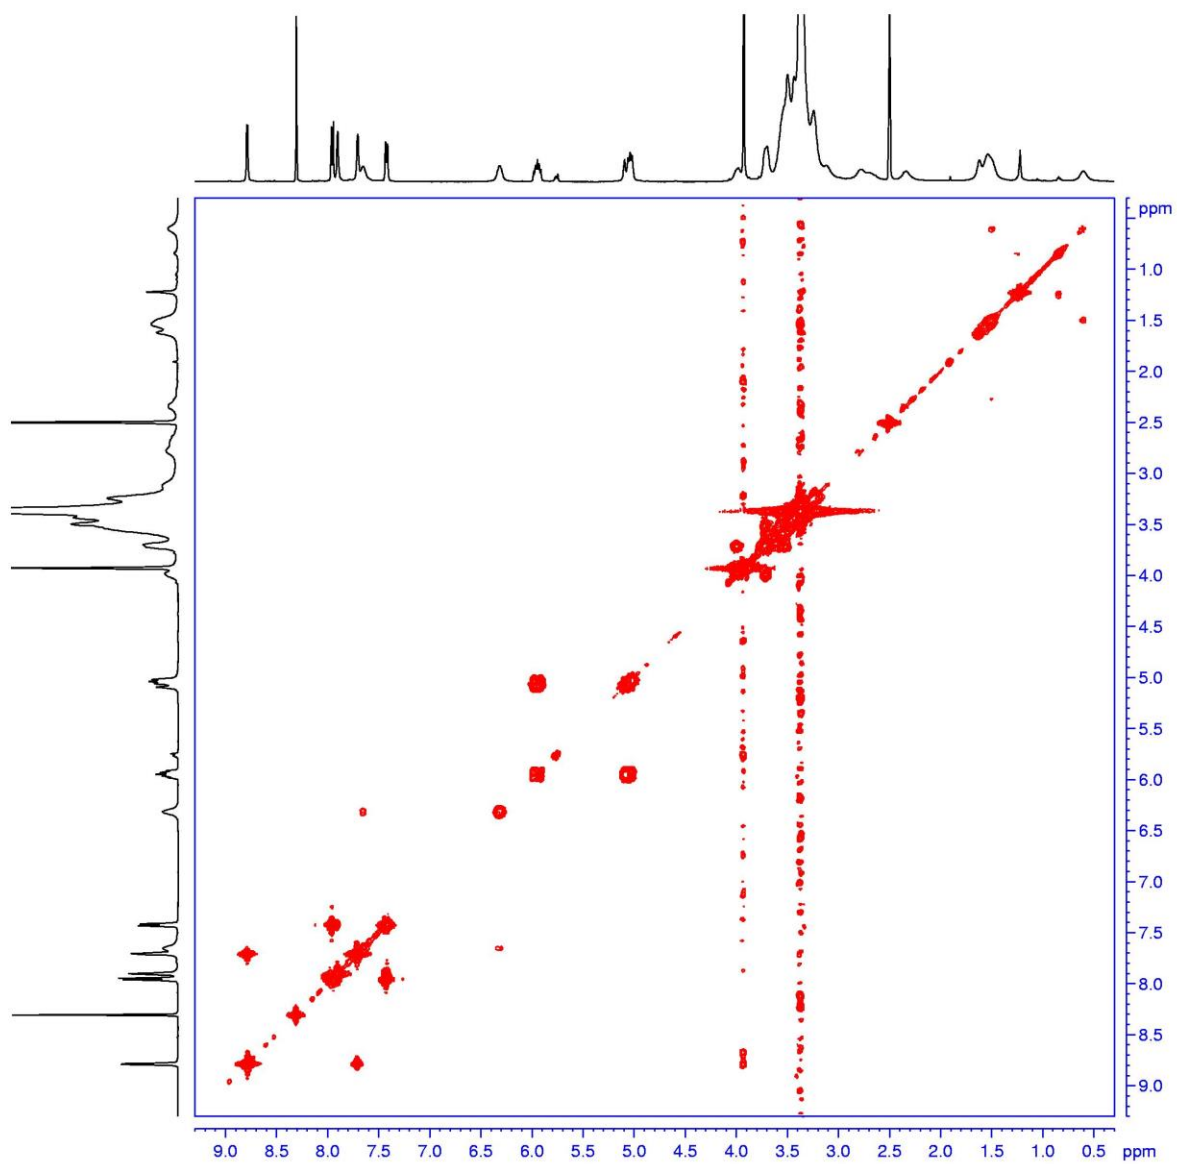

**Figure S37.**  $^1\text{H}$ -gs-COSY NMR spectrum of catalyst **Q6** ( $\text{DMSO-d}_6$ )

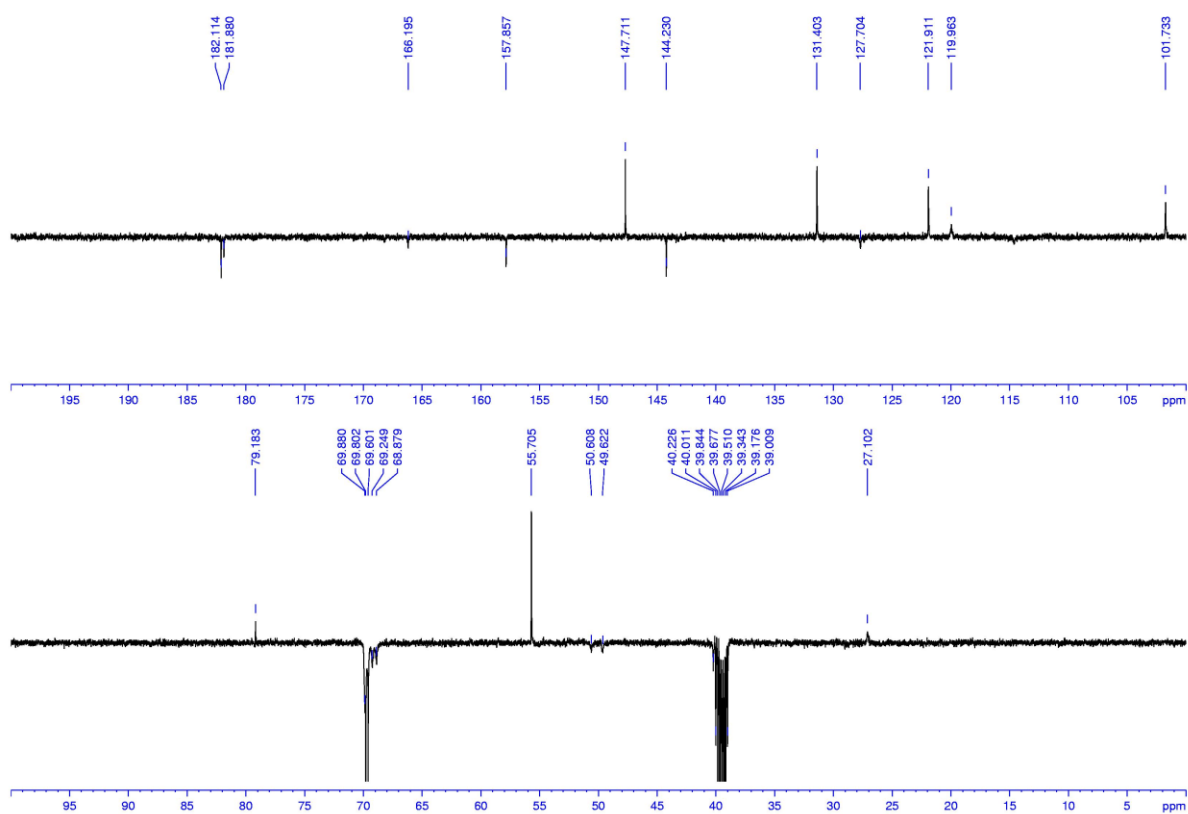

**Figure S38.**  $^{13}\text{C}$  DEPTQ NMR spectrum of catalyst **Q6** (DMSO- $\text{d}_6$ )

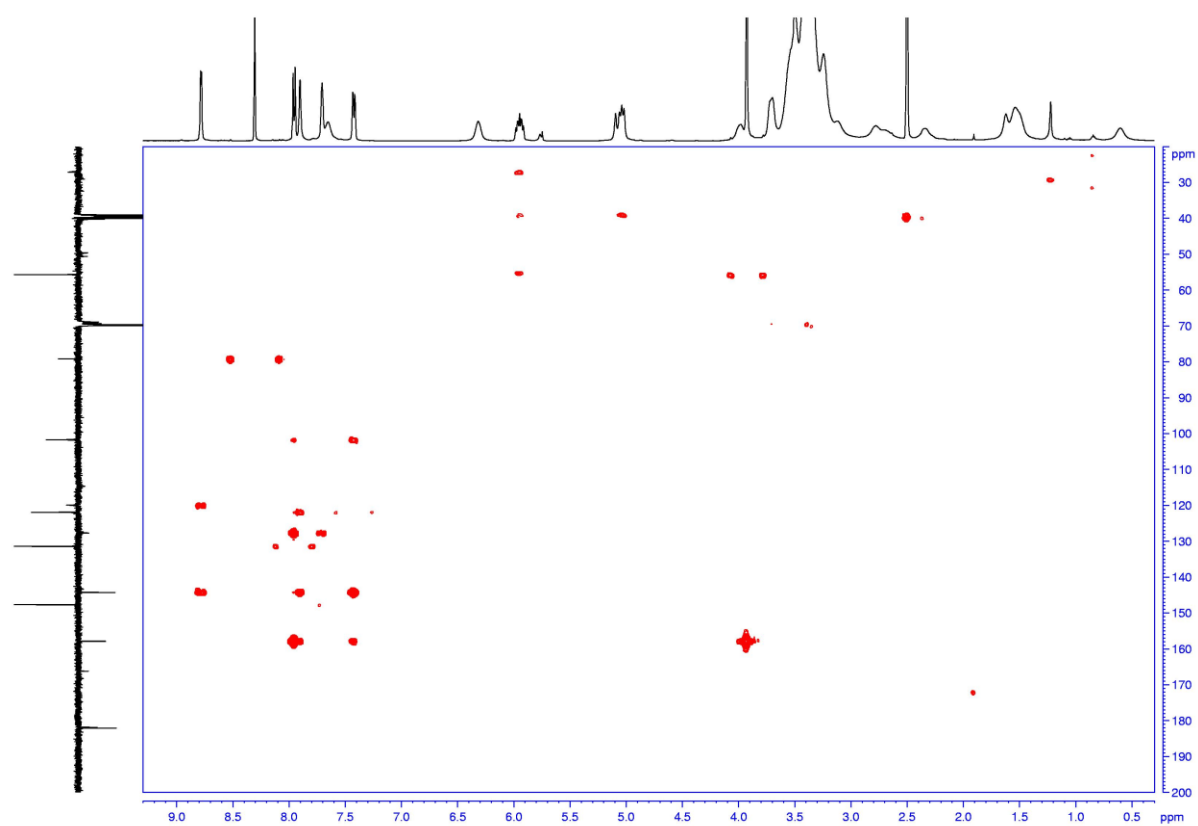

**Figure S39.**  $^1\text{H}$ ,  $^{13}\text{C}$ -gs-HMBC NMR spectrum of catalyst **Q6** (DMSO- $\text{d}_6$ )

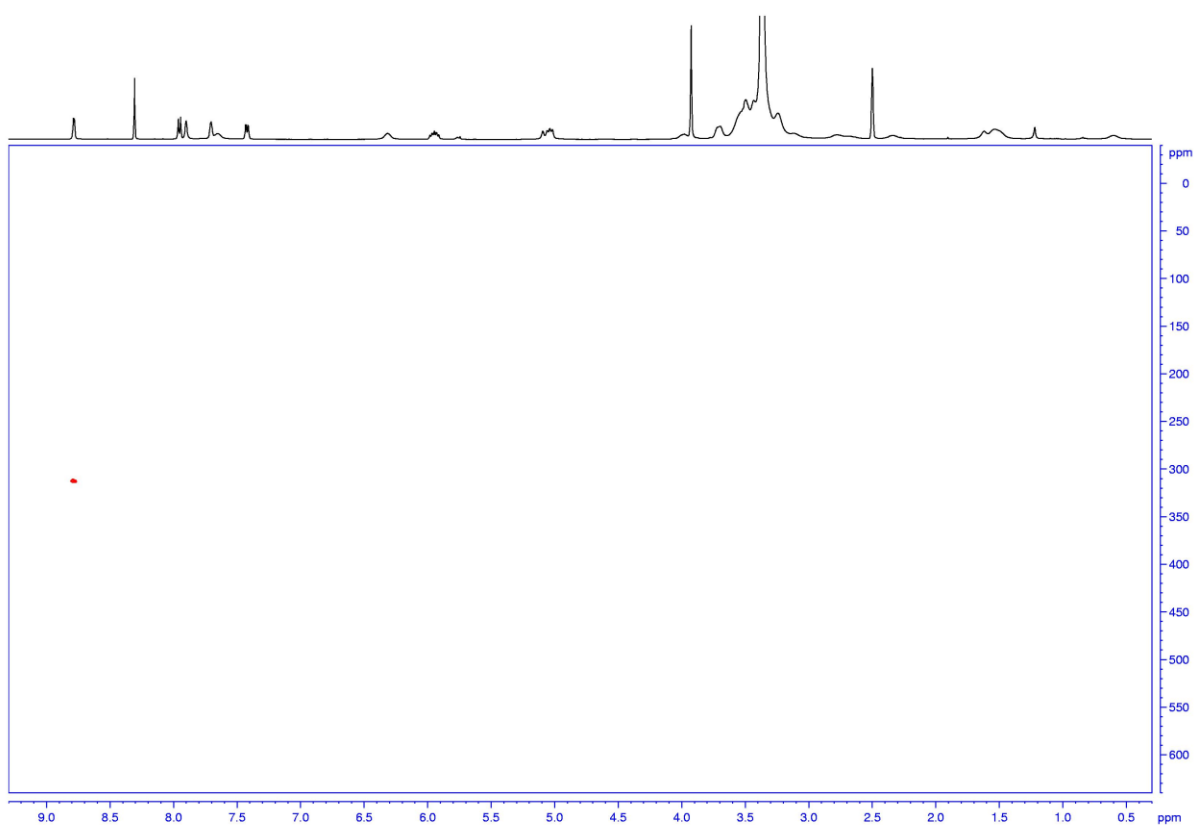

**Figure S40.**  $^1\text{H}$ ,  $^{15}\text{N}$ -gs-HMBC NMR spectrum of catalyst **Q6** ( $\text{DMSO-d}_6$ )

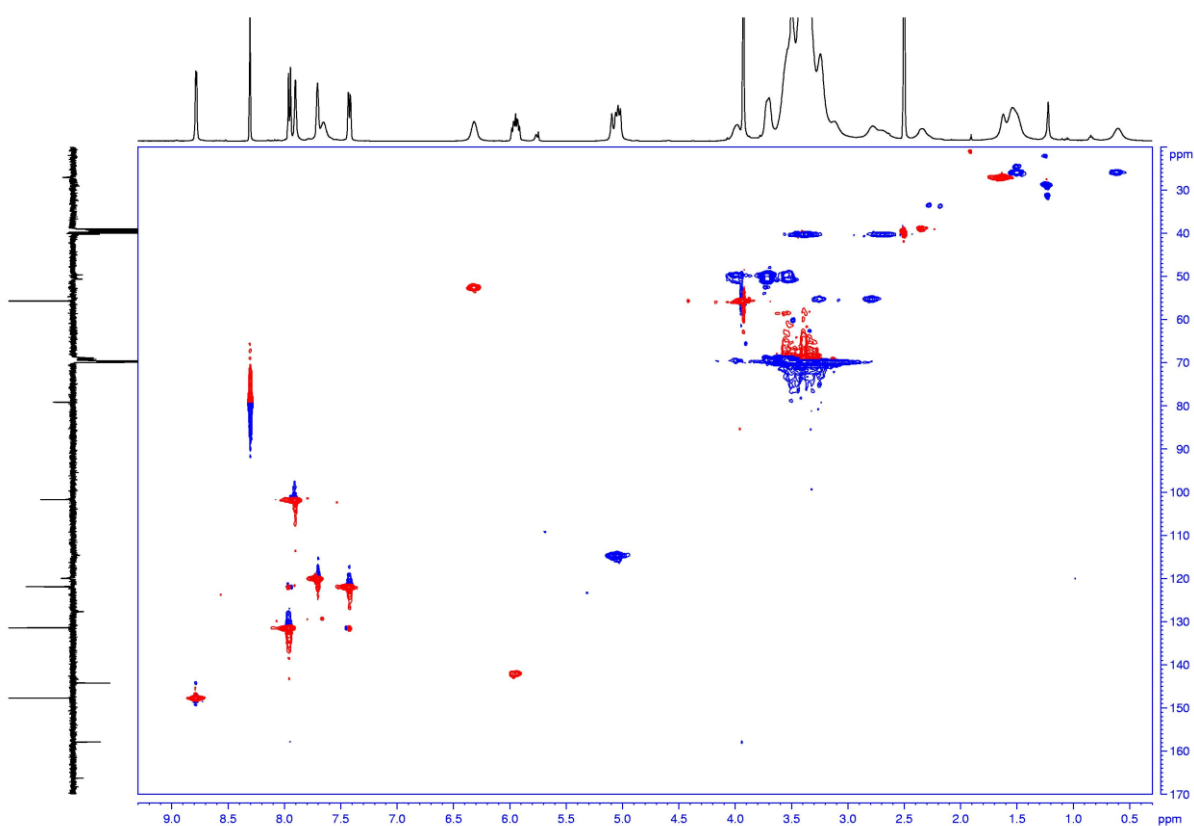

**Figure S41.**  $^1\text{H}$ ,  $^{13}\text{C}$ -gs-HSQC NMR spectrum of intermediate **Q6** ( $\text{DMSO-d}_6$ )

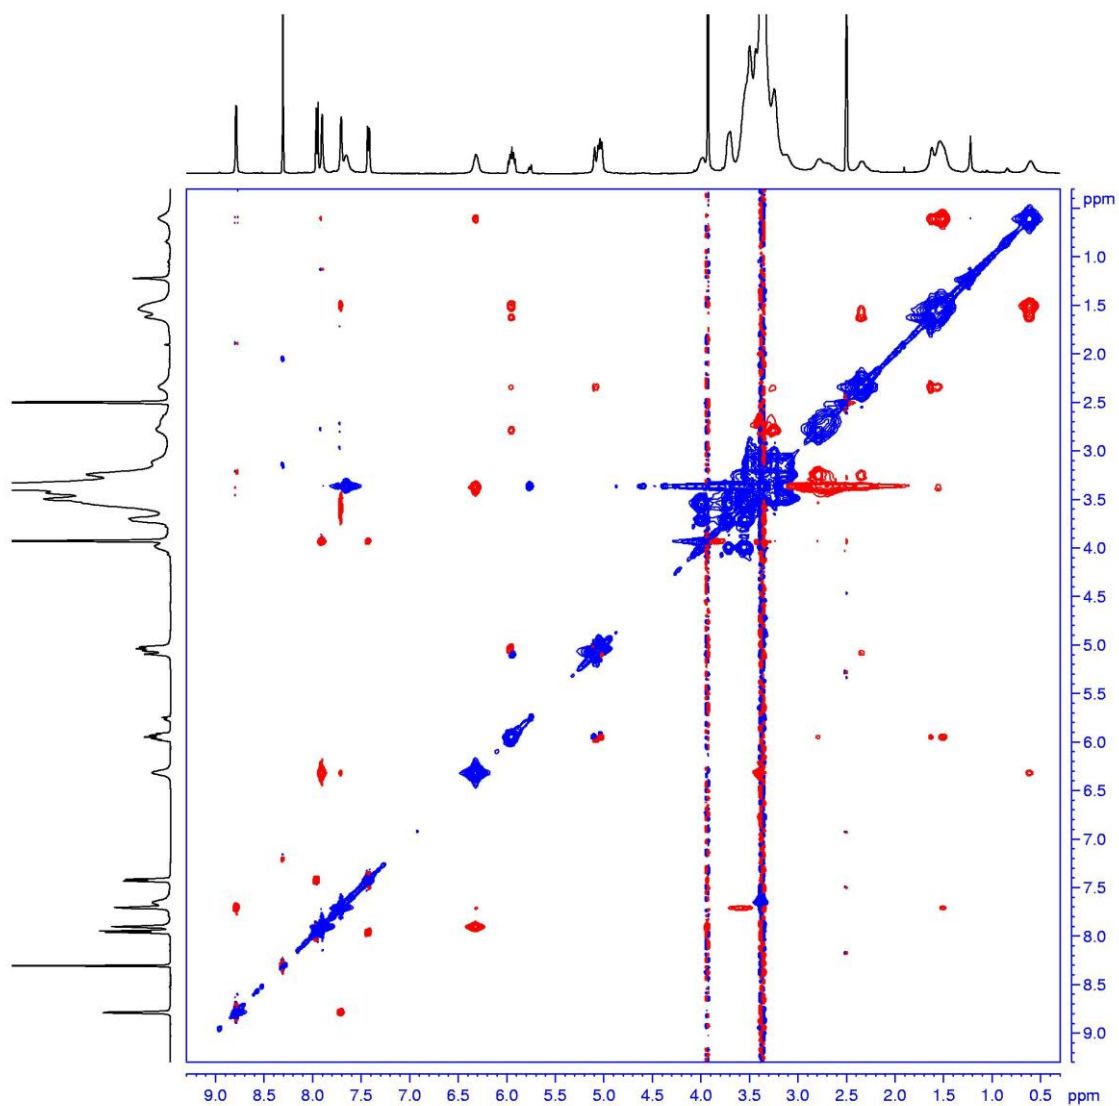

**Figure S42.**  $^1\text{H}$ ,  $^1\text{H}$ -gs-ROESY NMR spectrum of intermediate **Q6** ( $\text{DMSO-d}_6$ )

NMR spectra of catalyst **HQ5**

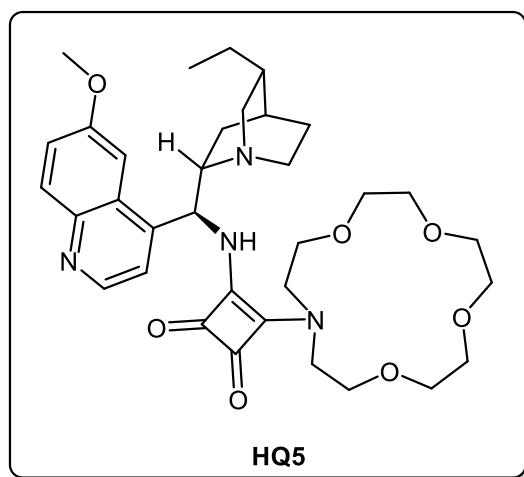

**Figure S43.** Molecule structure of catalyst **HQ5**

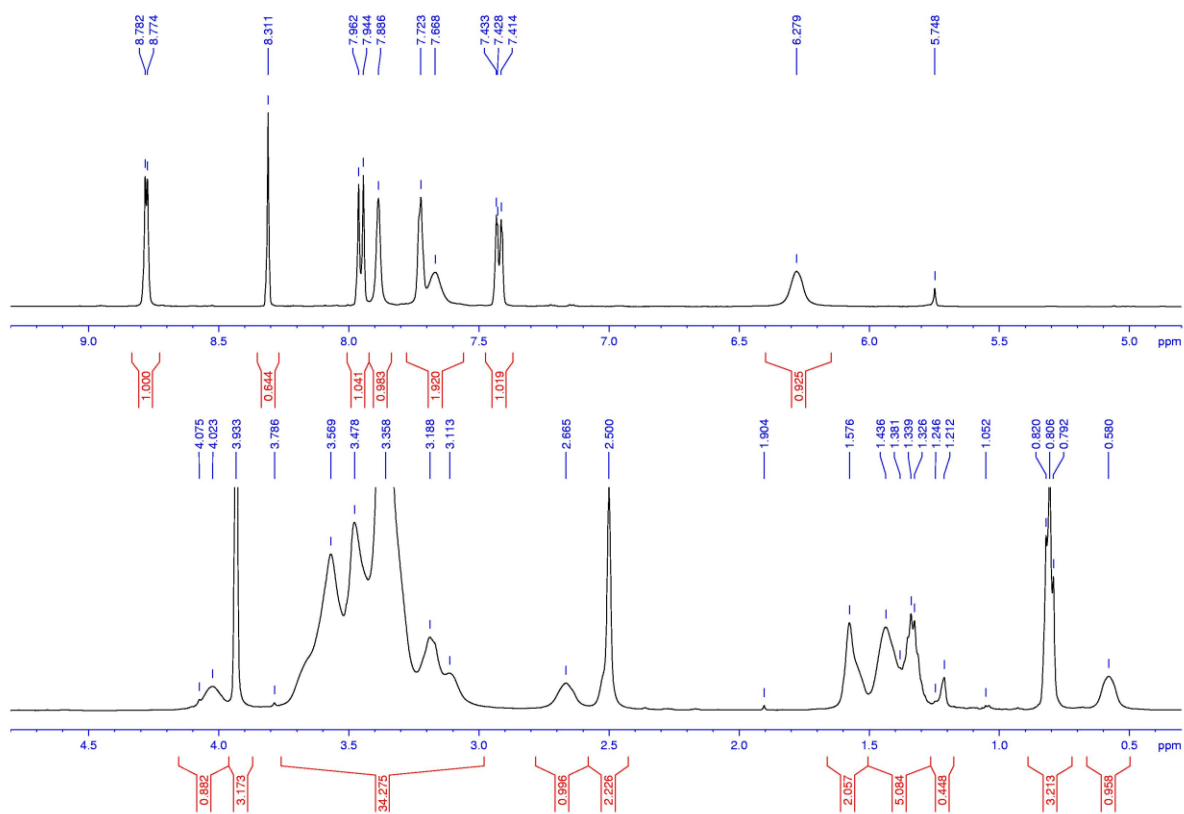

**Figure S44.** <sup>1</sup>H NMR spectrum of catalyst **HQ5** (500.13 MHz, DMSO-d<sub>6</sub>)

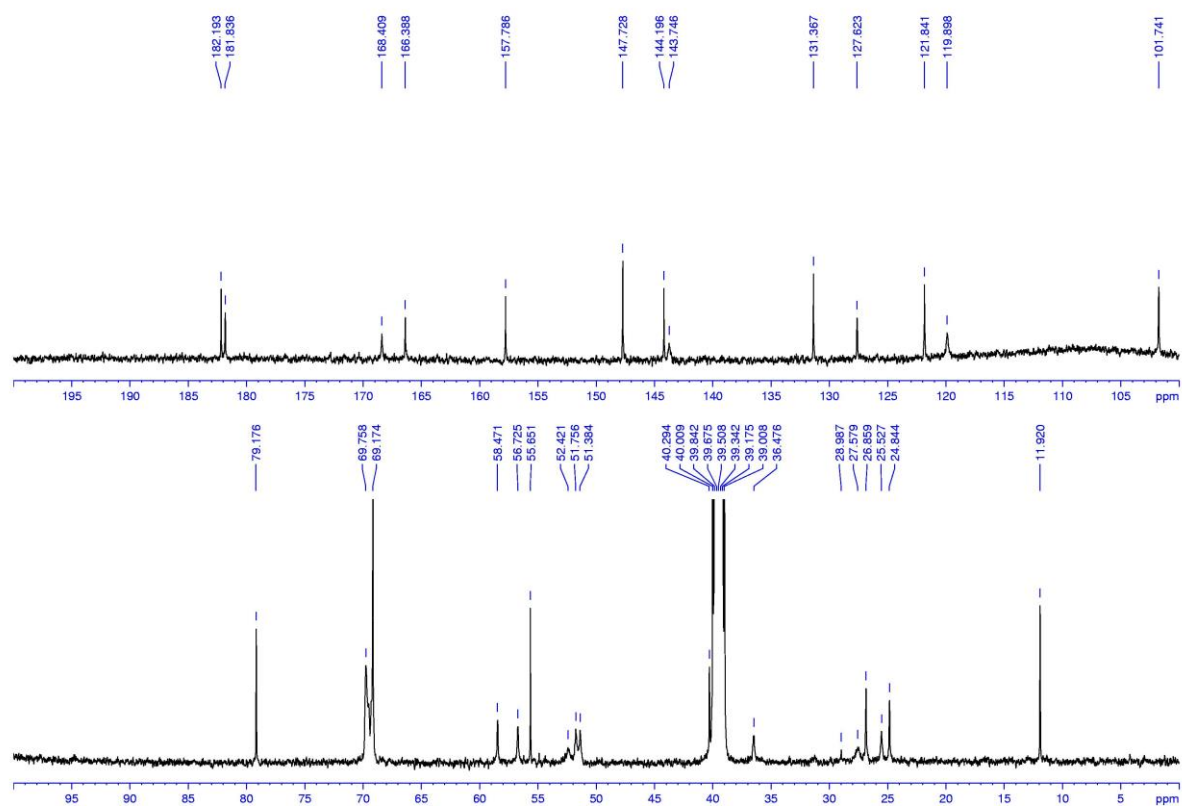

**Figure S45.** <sup>13</sup>C NMR spectrum of catalyst **HQ5** (125.76 MHz, DMSO-d<sub>6</sub>)

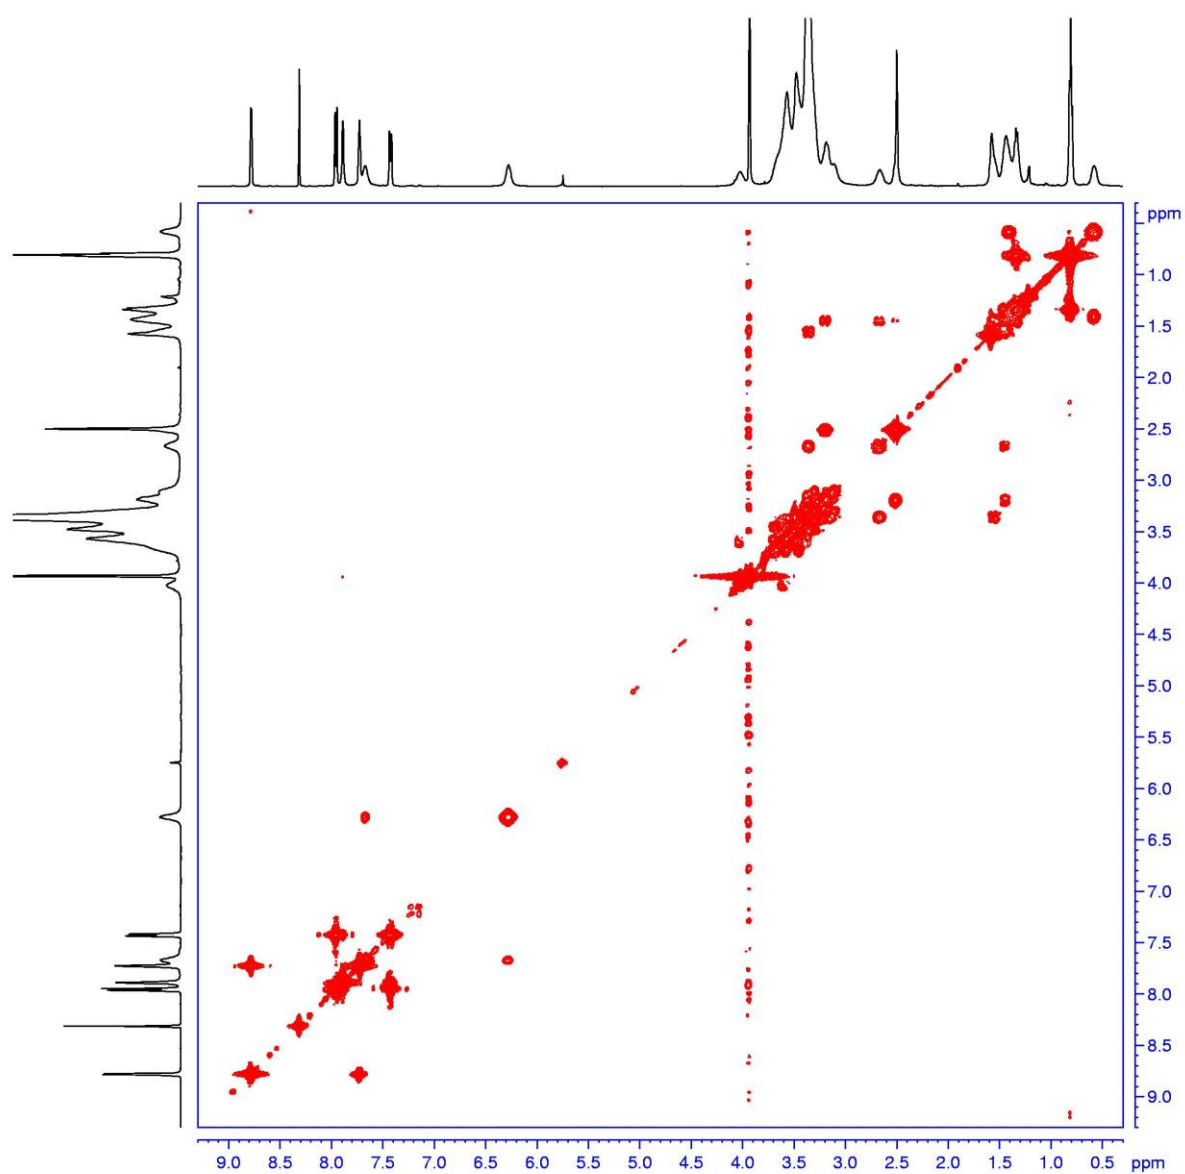

**Figure S46.**  $^1\text{H}$ -gs-COSY NMR spectrum of catalyst **HQ5** ( $\text{DMSO-d}_6$ )



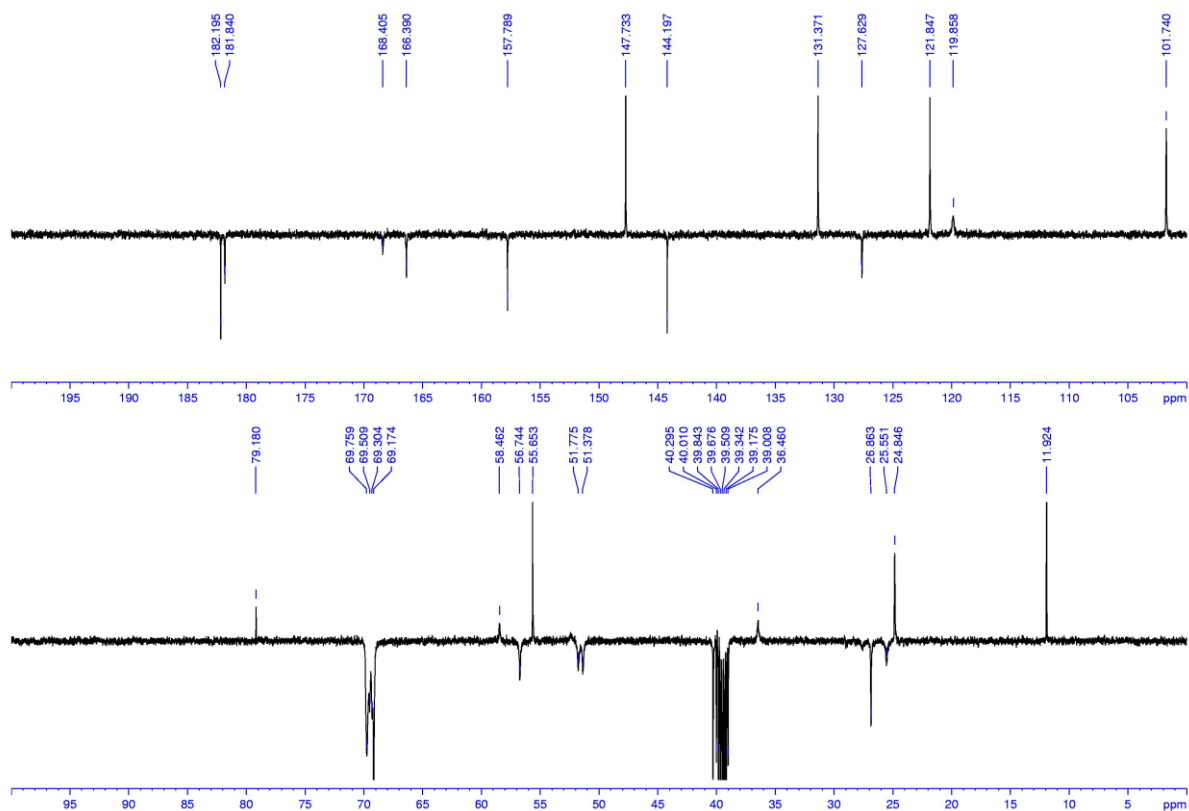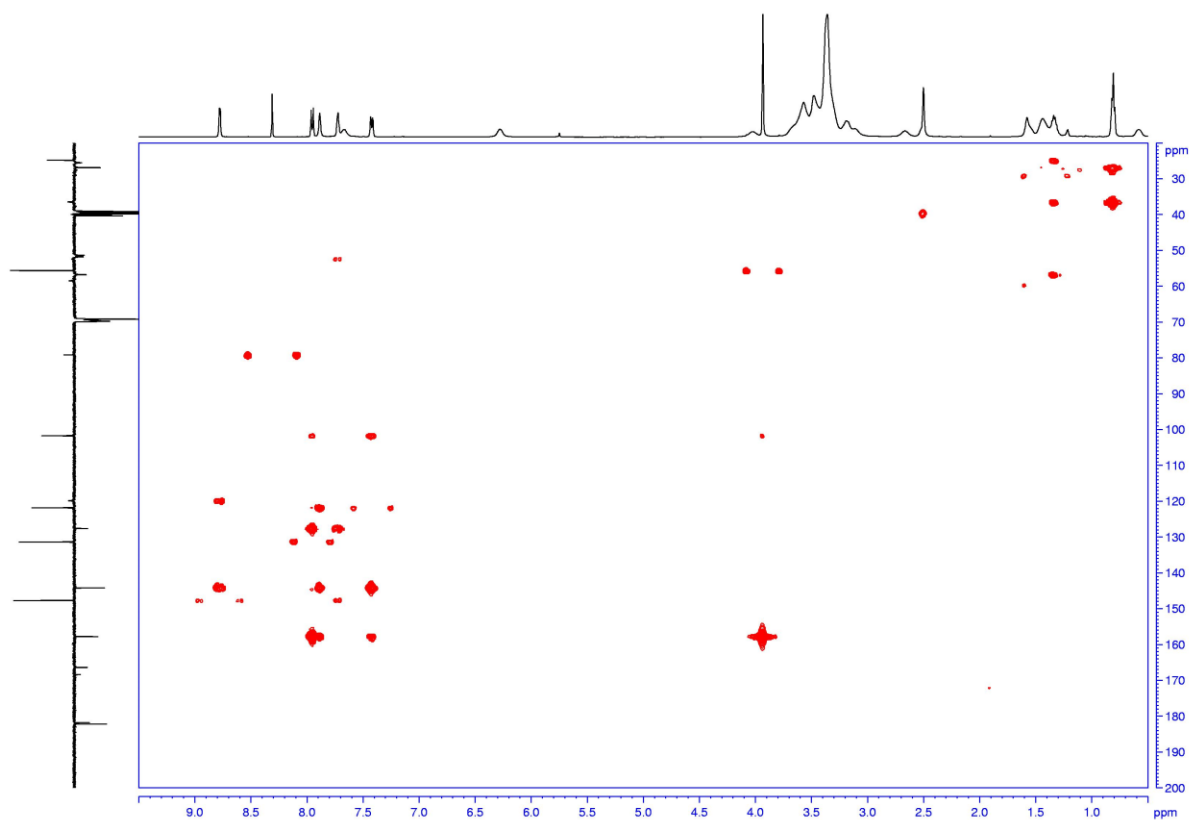

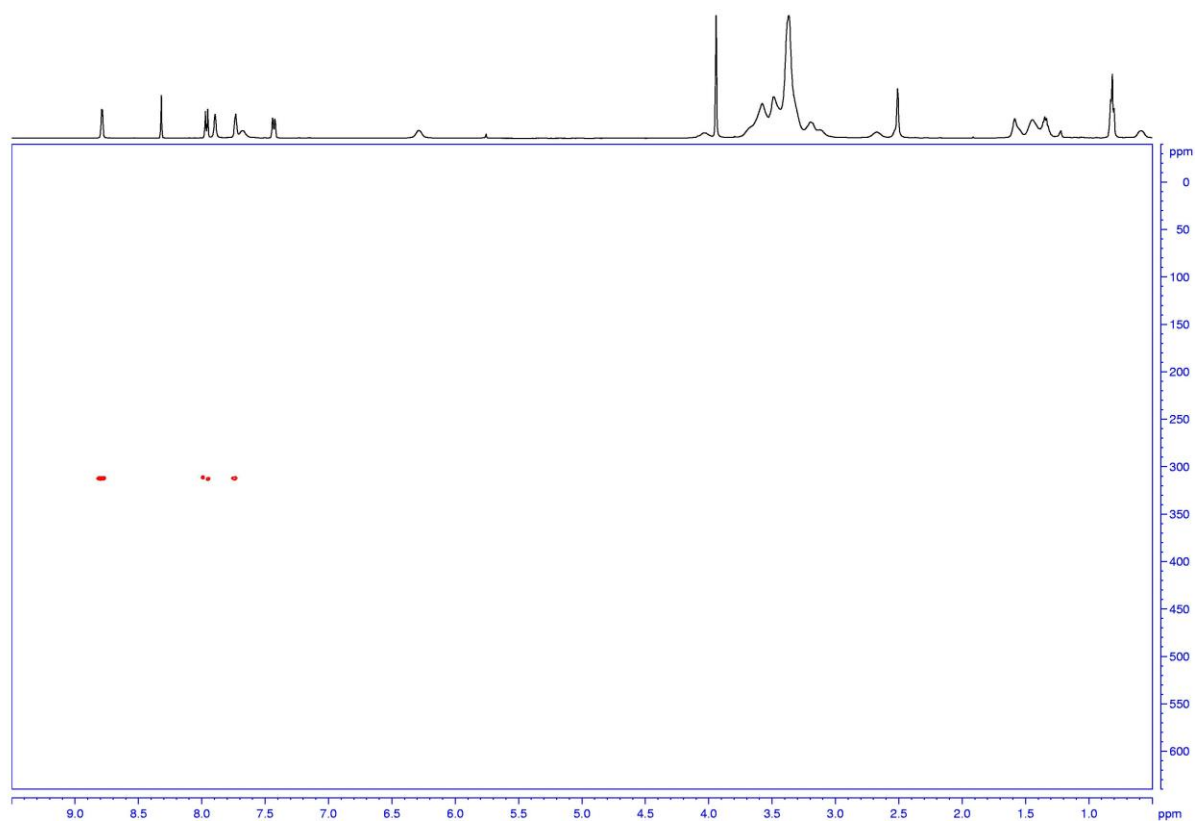

**Figure S49.**  $^1\text{H}$ ,  $^{15}\text{N}$ -gs-HMBC NMR spectrum of catalyst **HQ5** ( $\text{DMSO-d}_6$ )

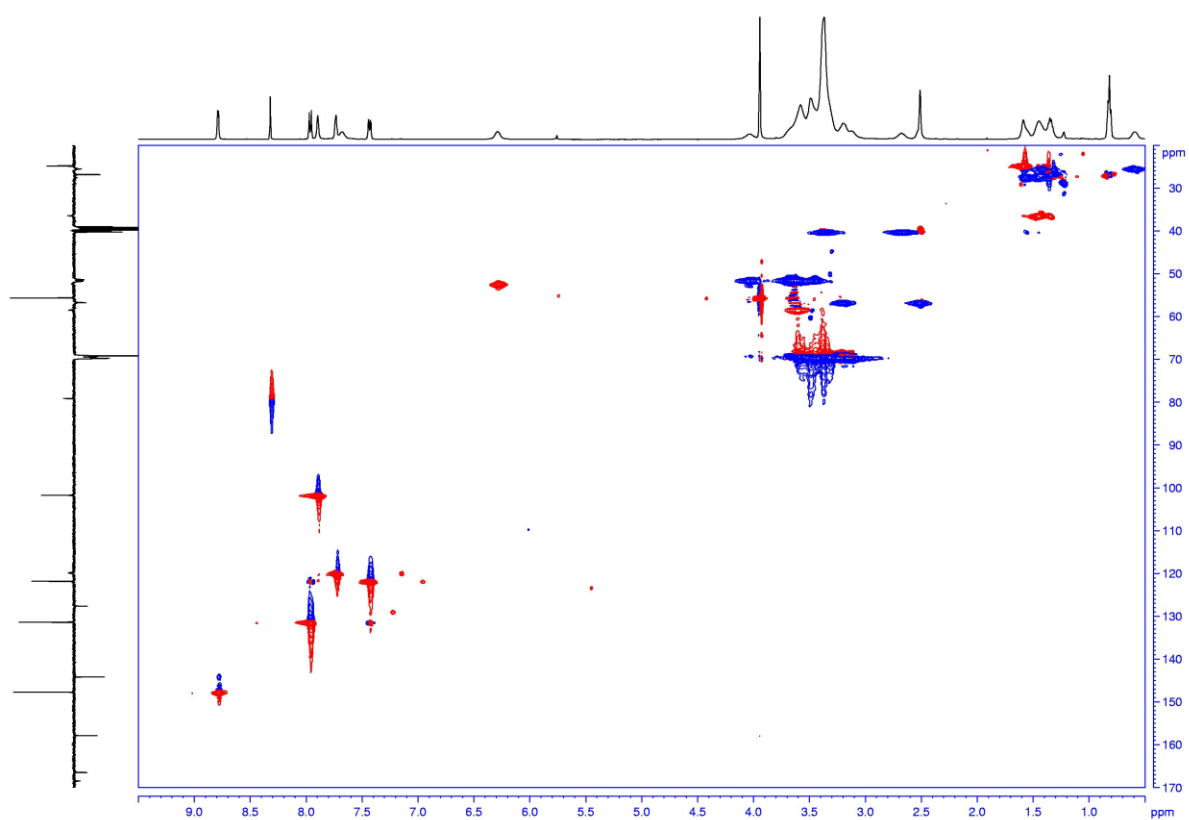

**Figure S50.**  $^1\text{H}$ ,  $^{13}\text{C}$ -gs-HSQC NMR spectrum of intermediate **HQ5** ( $\text{DMSO-d}_6$ )

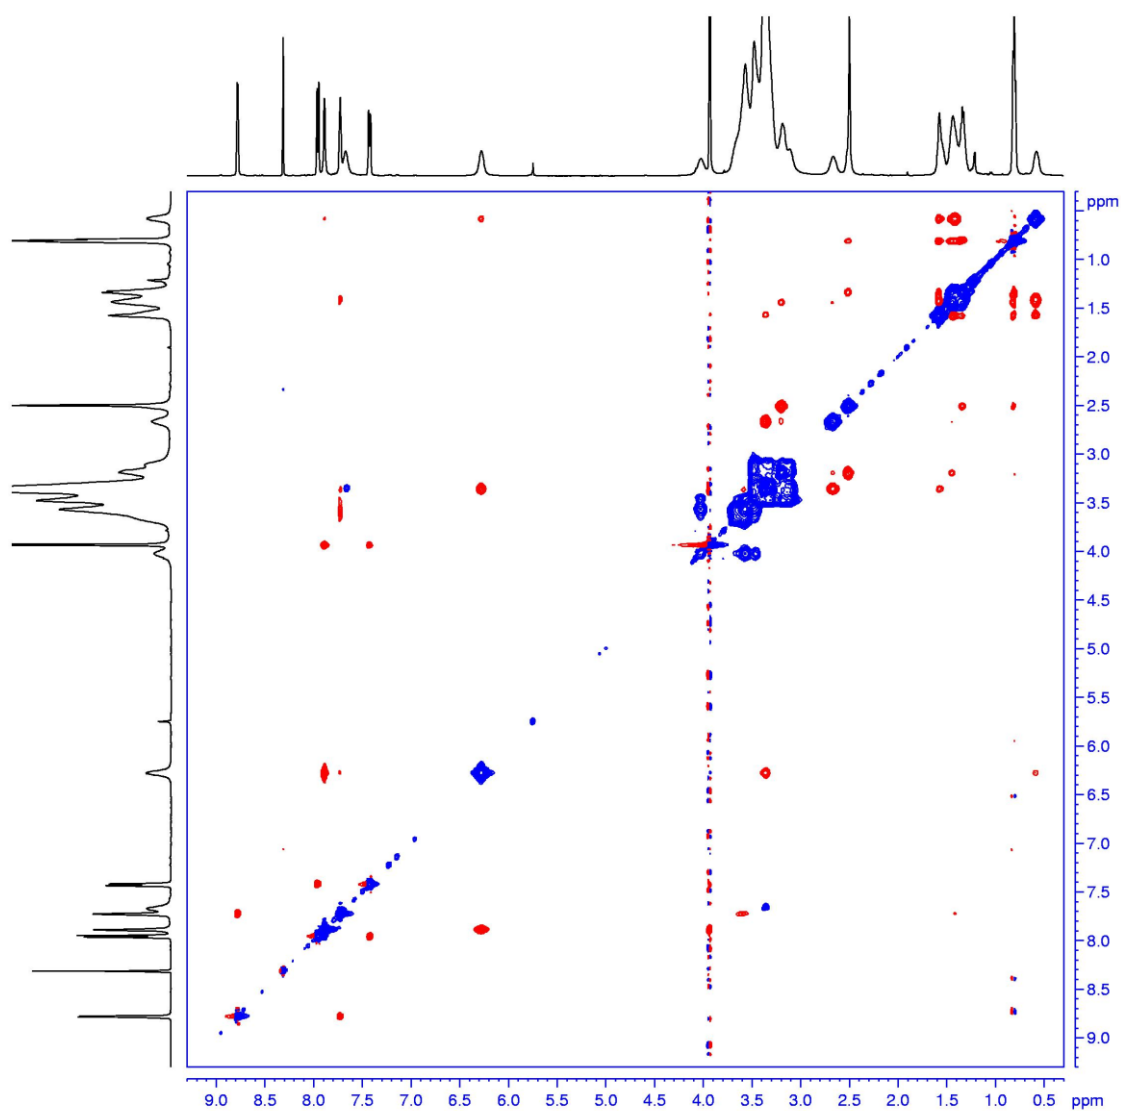

**Figure S51.**  $^1\text{H}$ ,  $^1\text{H}$ -gs-ROESY NMR spectrum of intermediate **HQ5** ( $\text{DMSO-d}_6$ )

NMR spectra of catalyst **G5**

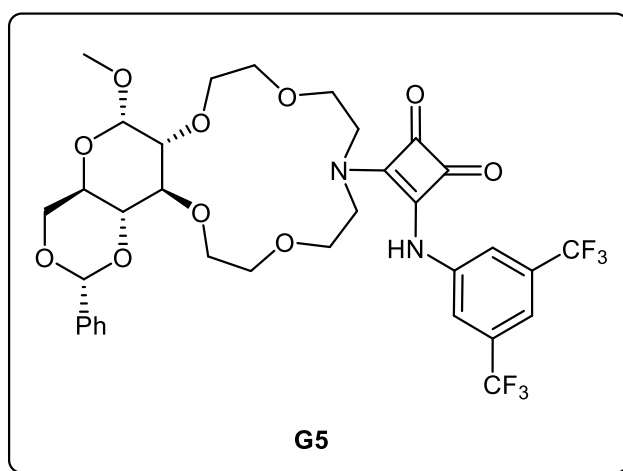

**Figure S52.** Molecule structure of catalyst **G5**

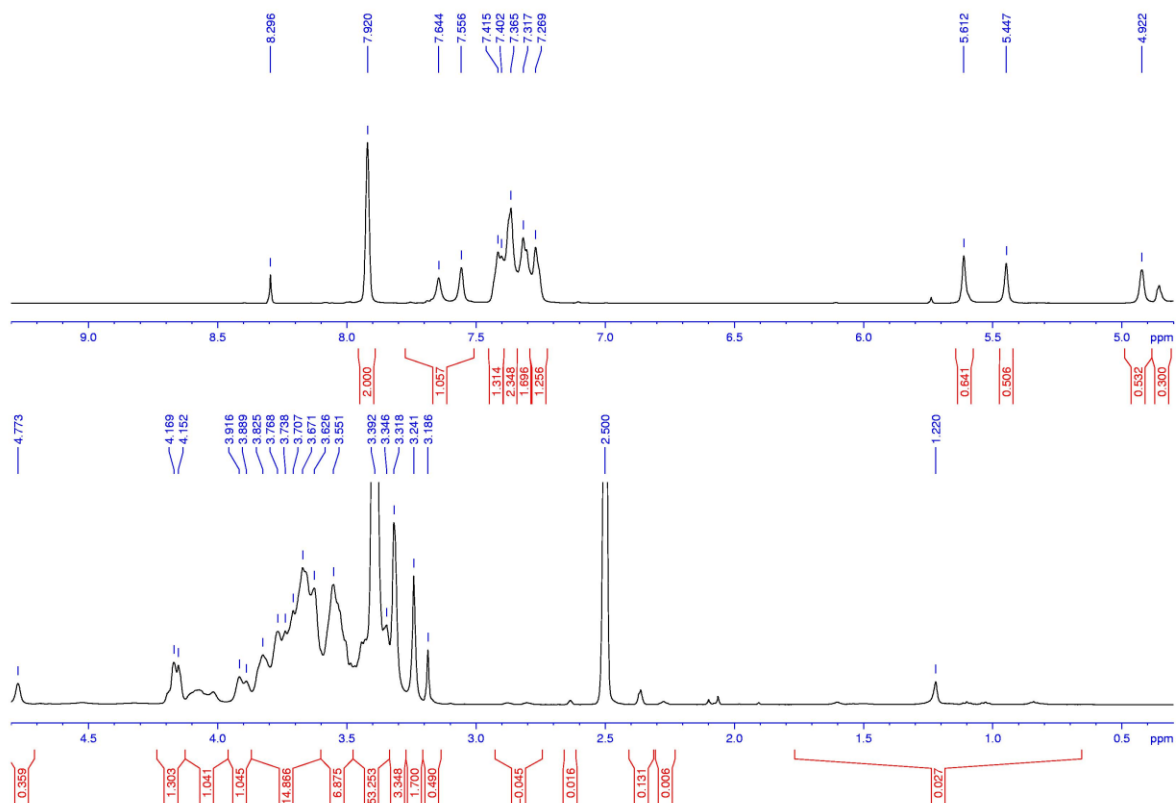

**Figure S53.**  $^1\text{H}$  NMR spectrum of catalyst **G5** (500.13 MHz,  $\text{DMSO-d}_6$ )

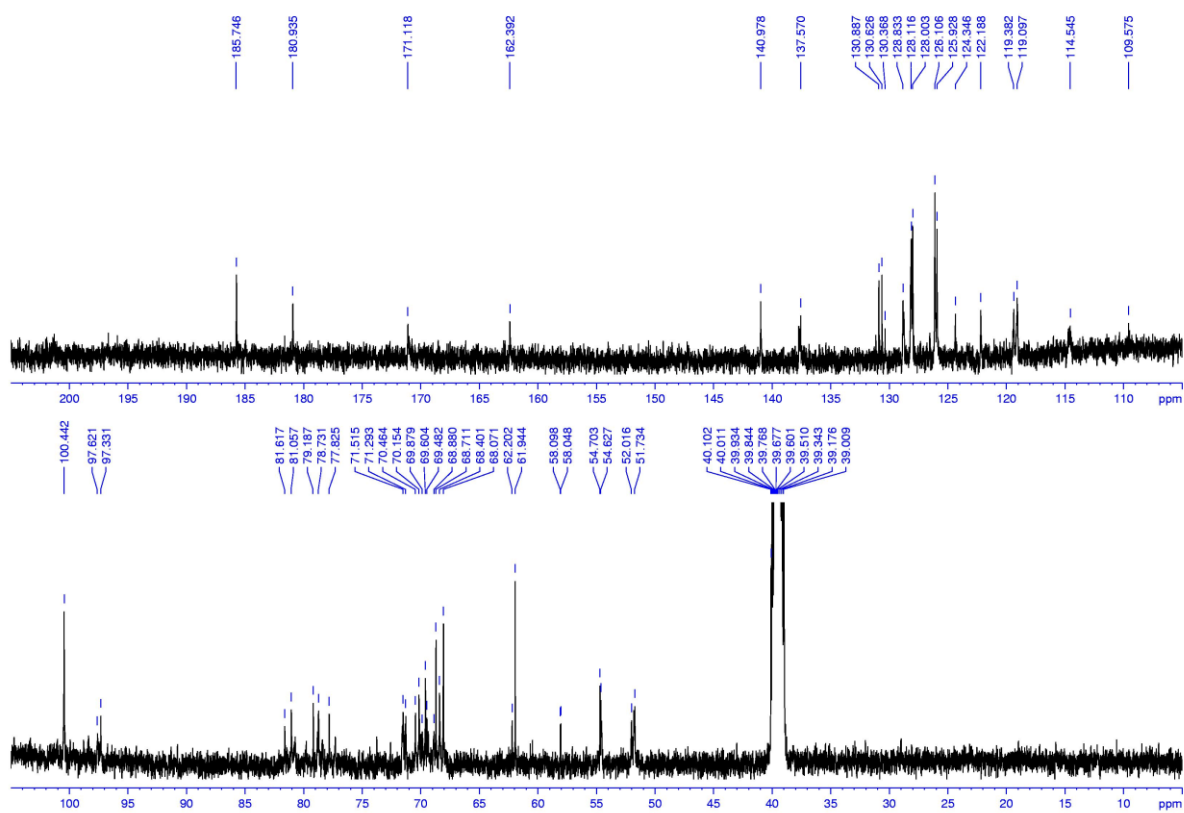

**Figure S54.**  $^{13}\text{C}$  NMR spectrum of catalyst **G5** (125.76 MHz,  $\text{DMSO-d}_6$ )

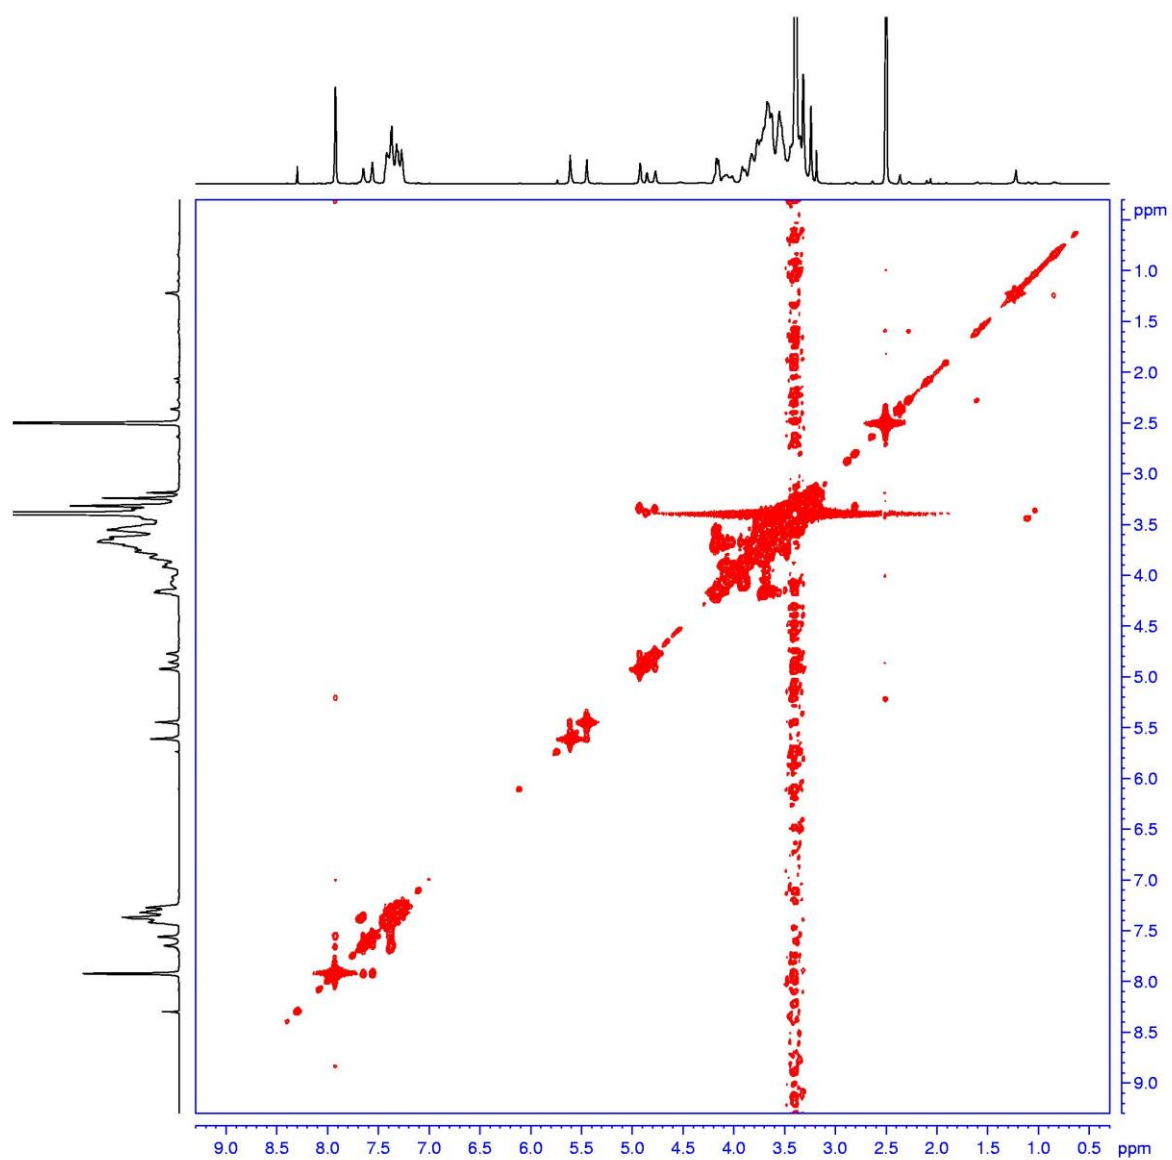

**Figure S55.**  $^1\text{H}$ -gs-COSY NMR spectrum of catalyst **G5** ( $\text{DMSO-d}_6$ )

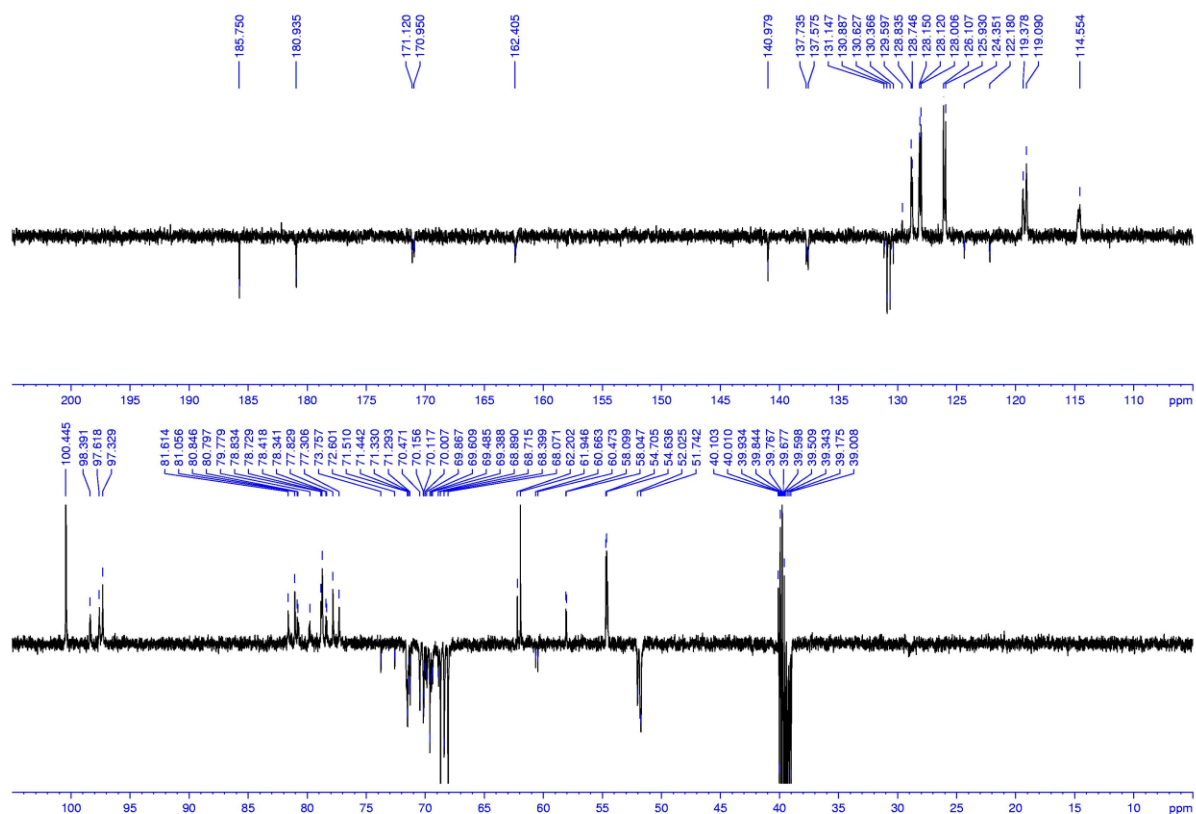

**Figure S56.**  $^{13}\text{C}$  DEPTQ NMR spectrum of catalyst **G5** ( $\text{DMSO-d}_6$ )

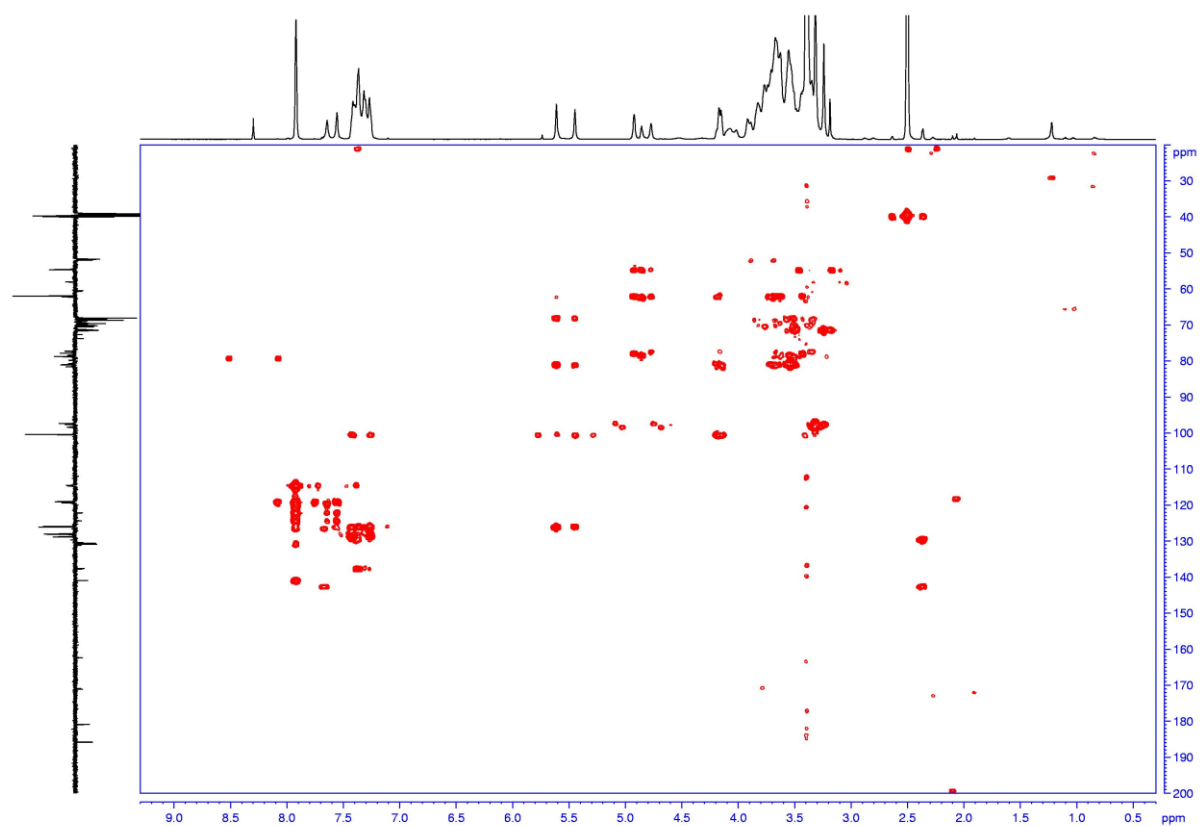

**Figure S57.**  $^1\text{H}$ ,  $^{13}\text{C}$ -gs-HMBC NMR spectrum of catalyst **G5** ( $\text{DMSO-d}_6$ )

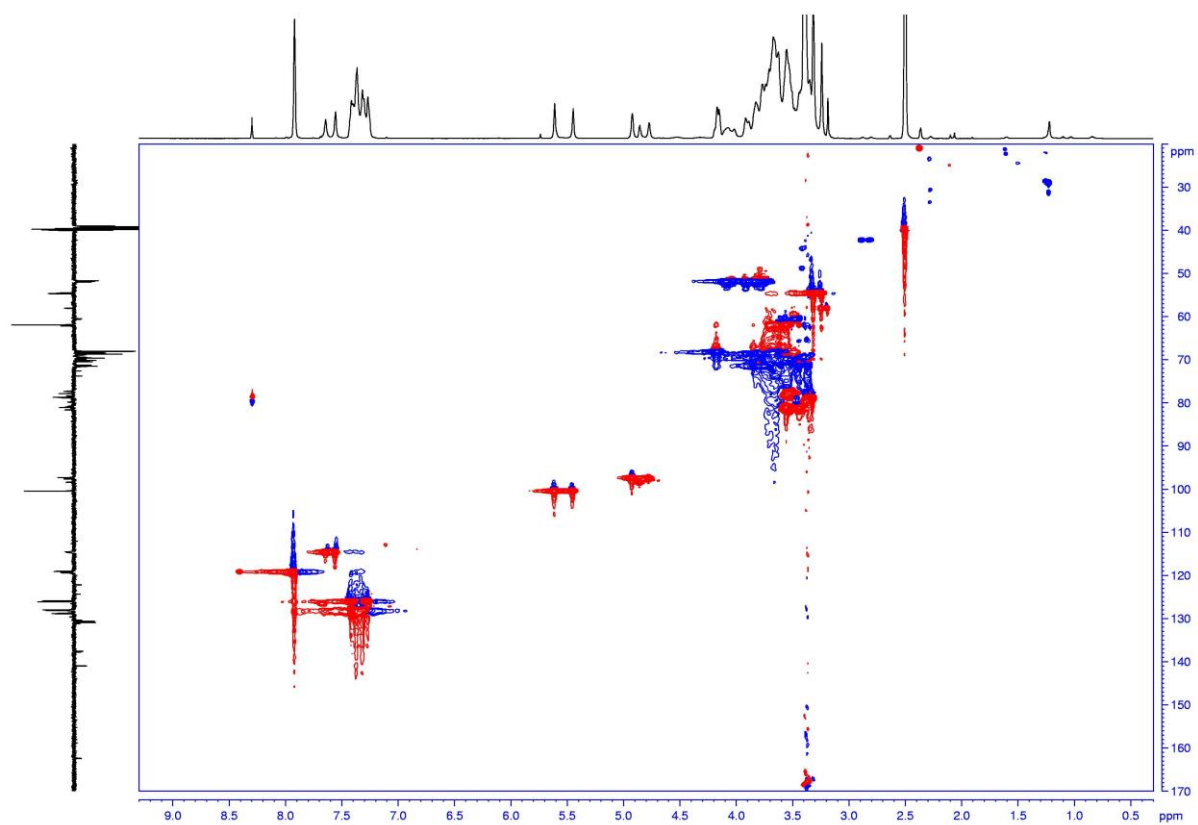

**Figure S58.**  $^1\text{H}$ ,  $^{13}\text{C}$ -gs-HSQC NMR spectrum of intermediate **G5** ( $\text{DMSO-d}_6$ )

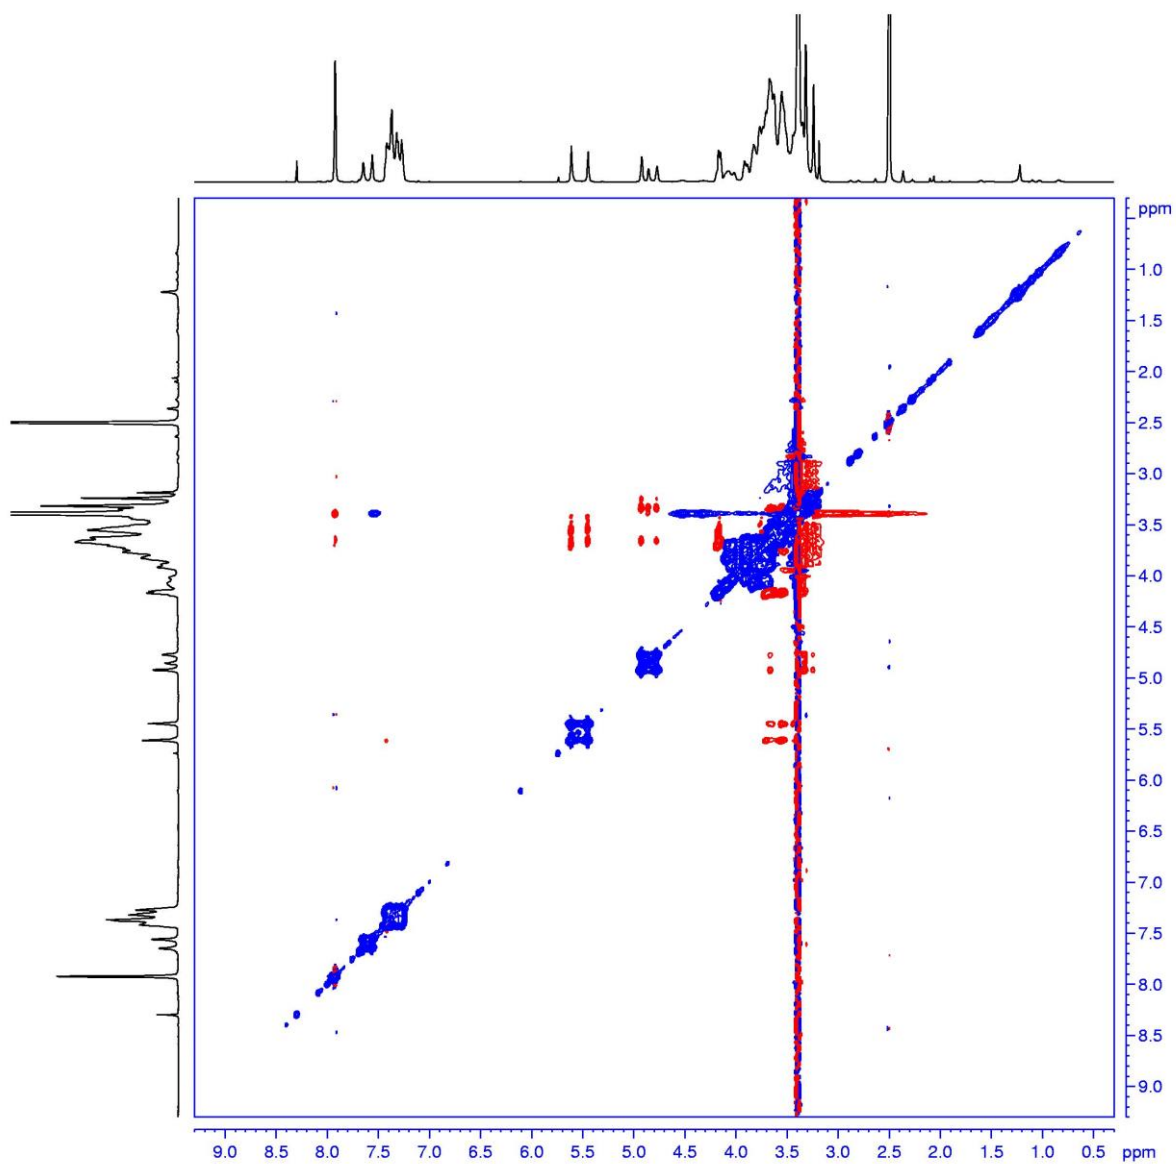

**Figure S59.**  $^1\text{H}$ ,  $^1\text{H}$ -gs-ROESY NMR spectrum of intermediate **G5** ( $\text{DMSO-d}_6$ )



## 2. HPLC chromatograms

Product **3** of  $\alpha$ -alkylation reaction

Method: Phenomenex Lux<sup>®</sup> 5  $\mu$ m Cellulose-2 (250  $\times$  4.6 mm ID), hexane/ethanol 95:5, 0.8 mL min<sup>-1</sup>, 20 °C,  $\lambda$ =254 nm

HPLC chromatogram of racemic mixture

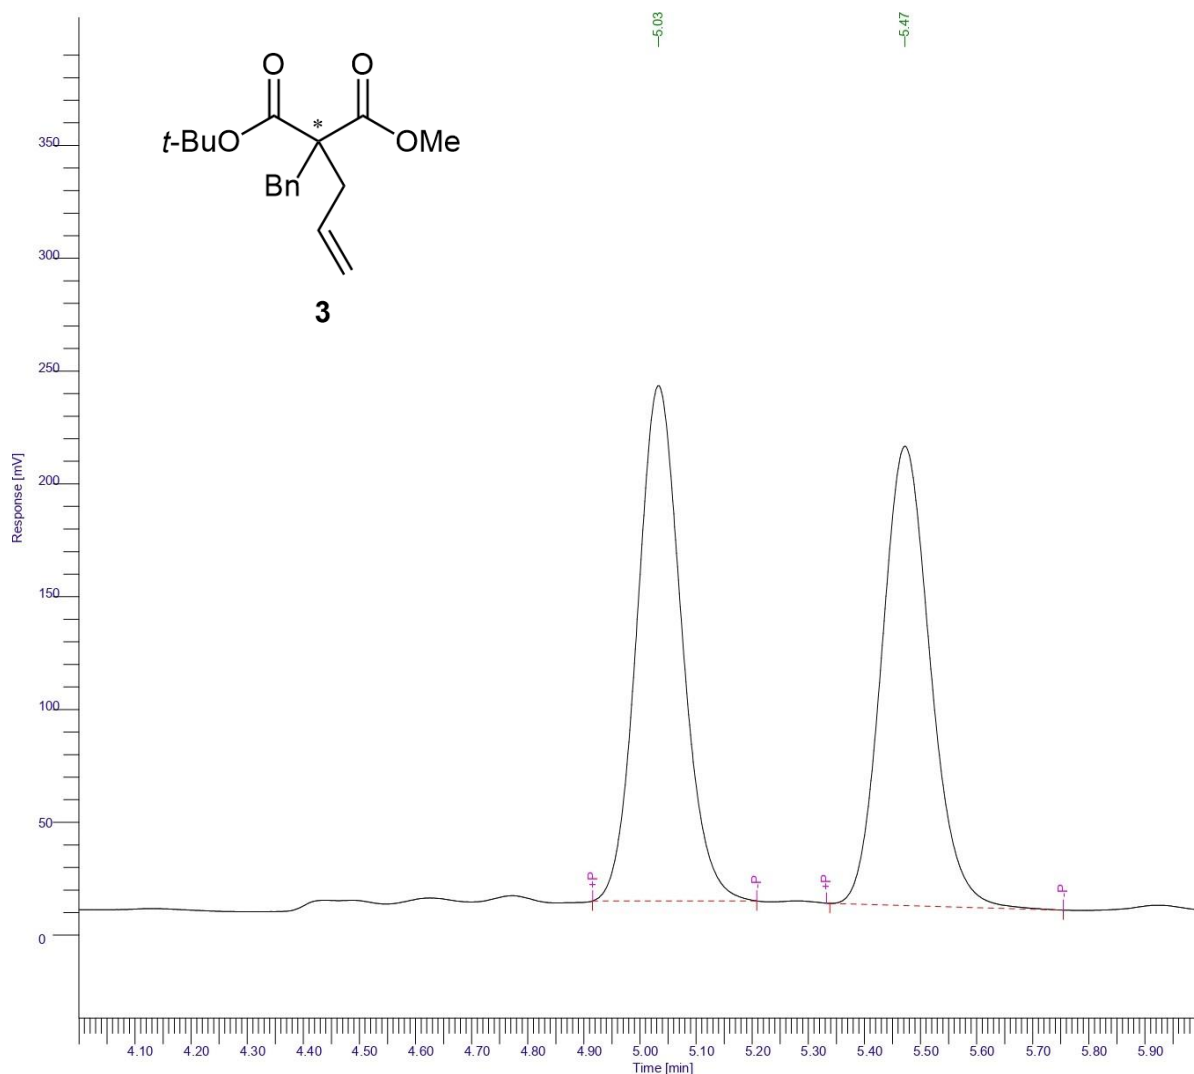

**Figure S60.** HPLC chromatogram of the racemic mixture of product **3**

**Table S1.** HPLC chromatogram peaks of the racemic mixture of product **3**

| Peak # | Time [min] | Area [ $\mu$ V·s] | Height [ $\mu$ V] | Area [%] |
|--------|------------|-------------------|-------------------|----------|
| 1      | 5.033      | 1255114.36        | 228333.54         | 50.70    |
| 2      | 5.472      | 1220626.56        | 203554.28         | 49.30    |
|        |            | 2475740.92        | 431887.81         | 100.00   |

HPLC chromatogram of product **3** with catalyst **C5** (17% ee)

Reaction conditions: *tert*-butyl methyl  $\alpha$ -benzylmalonate (1 eq), allyl iodide reagent (1.2 eq), **C5** catalyst (10 mol%), 50% aq. KOH base (50 eq), 2.4 mL DCM solvent, 0 °C, 24 h reaction time.

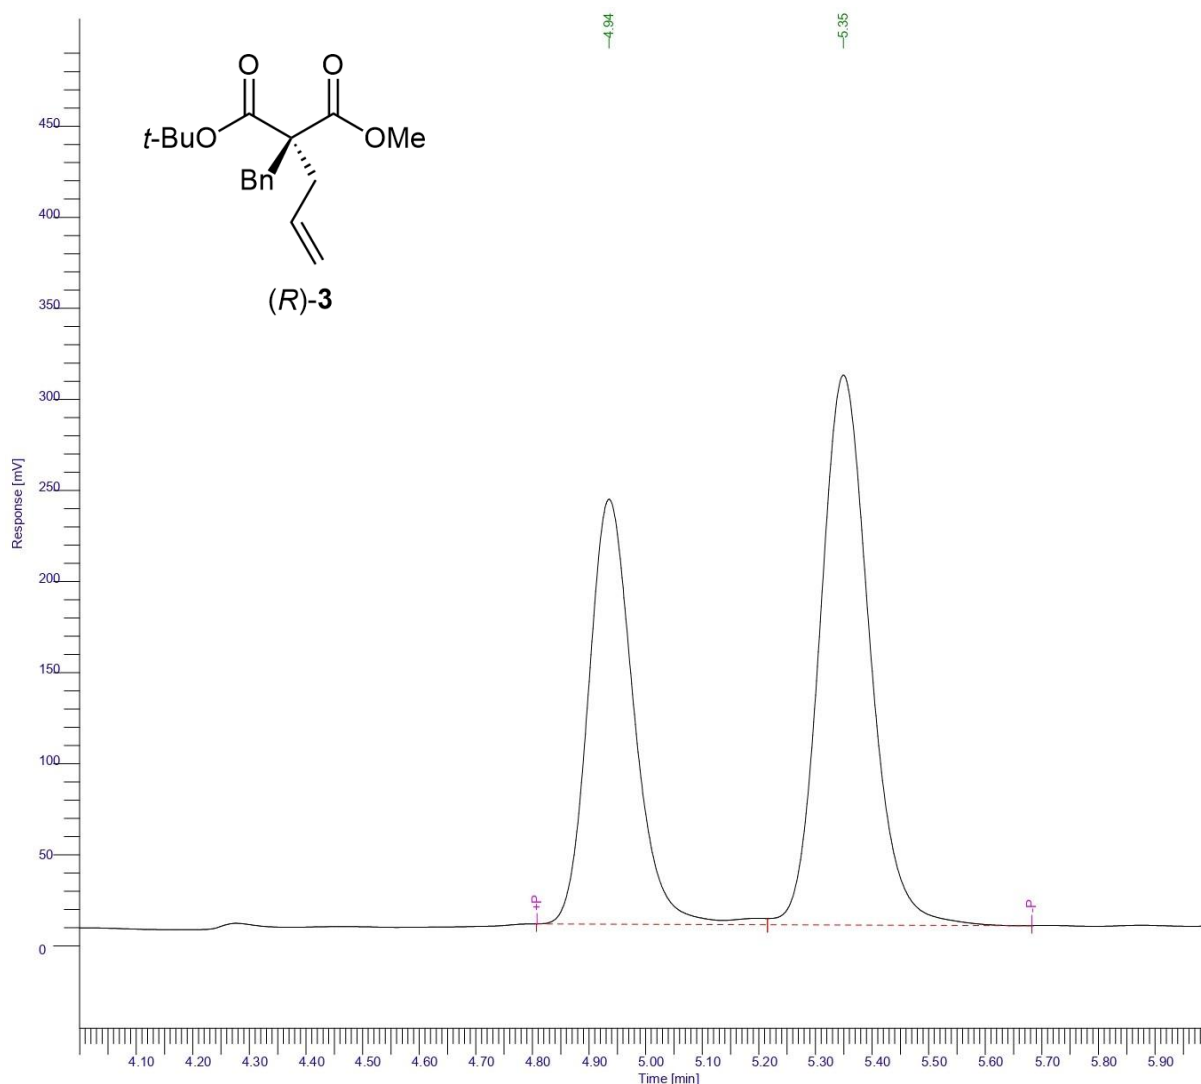

**Figure S61.** HPLC chromatogram of product (*R*)-**3** (17% ee)

**Table S2.** HPLC chromatogram peaks of product (*R*)-**3** (17% ee)

| Peak # | Time [min] | Area [ $\mu\text{V}\cdot\text{s}$ ] | Height [ $\mu\text{V}$ ] | Area [%] |
|--------|------------|-------------------------------------|--------------------------|----------|
| 1      | 4.935      | 1299138.74                          | 233277.90                | 41.47    |
| 2      | 5.349      | 1833377.33                          | 301912.66                | 58.53    |
|        |            | 3132516.08                          | 535190.57                | 100.00   |

## Product **5** of *Michael* addition reaction

Method: Kromasil® 5 µm AmyCoat® (250 × 4.6 mm ID), hexane/ethanol 85:15, 0.8 mL min<sup>-1</sup>, 20 °C, λ=254 nm

HPLC chromatogram of racemic mixture

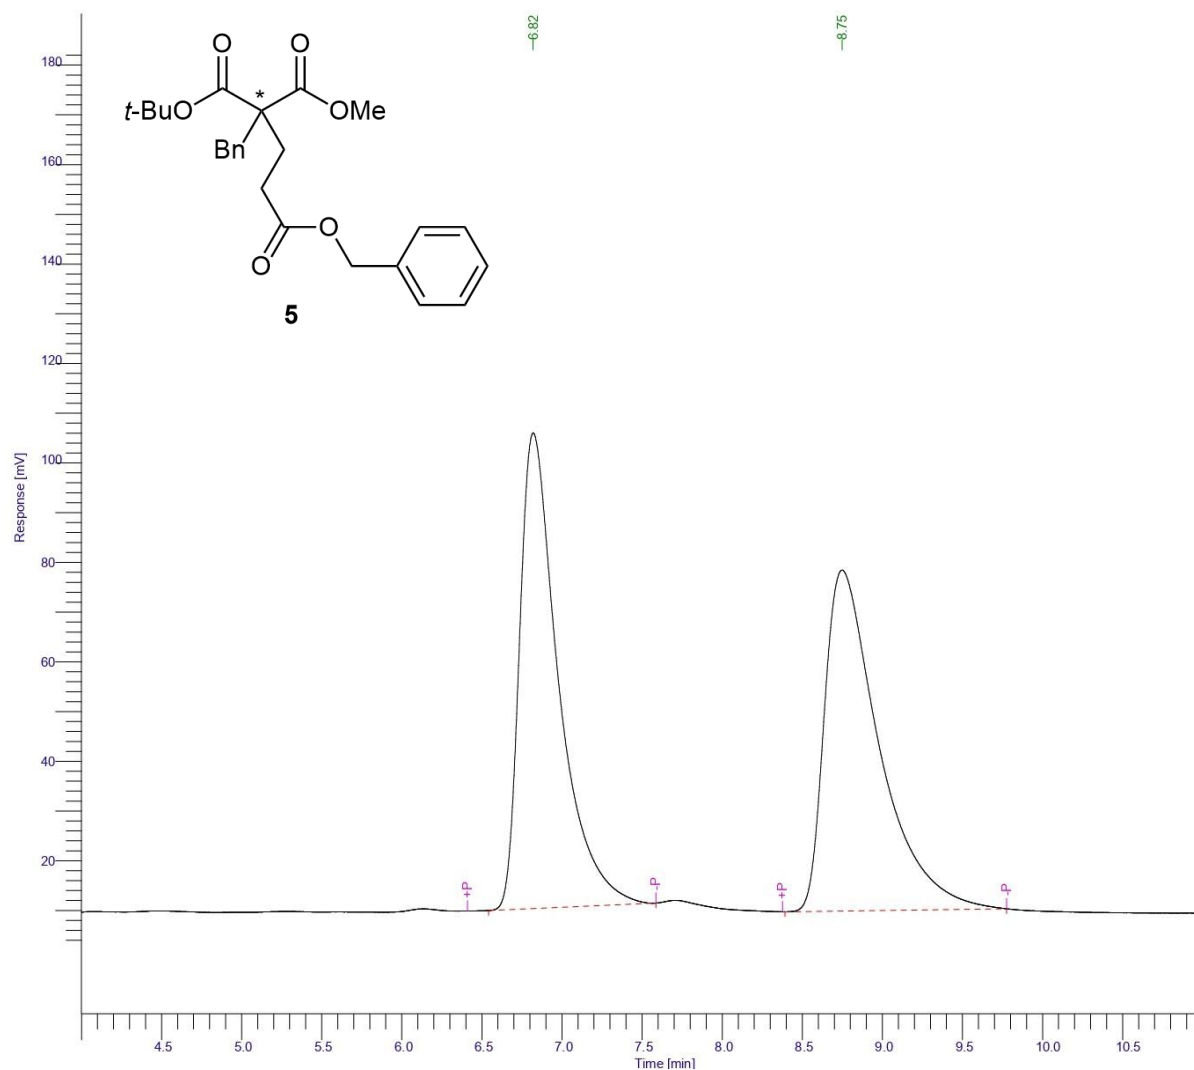

**Figure S62.** HPLC chromatogram of the racemic mixture of product **5**

**Table S3.** HPLC chromatogram peaks of the racemic mixture of product **5**

| Peak # | Time [min] | Area [µV·s] | Height [µV] | Area [%] |
|--------|------------|-------------|-------------|----------|
| 1      | 6.820      | 1609853.73  | 95671.16    | 49.79    |
| 2      | 8.749      | 1623189.02  | 68560.60    | 50.21    |
|        |            | 3233042.75  | 164231.76   | 100.00   |
